# Supplementary material for: Chromosome 22q11.2 deletion causes PERK-dependent vulnerability in dopaminergic neurons
Source: PubMed Central journal article supplement — eBioMedicine. 2020 Dec 17;63:103138. doi: 10.1016/j.ebiom.2020.103138 (PMC7753137; doi:10.1016/j.ebiom.2020.103138), 2020-12-17
Supplement: mmc2.pdf [file mmc2.pdf]

Supplementary Table1. Information of patients carrying 22q11.2 deletion.

| Sample name/Age (years)/Sex | CNVs             | CNV region (hg18)           | Psychiatric diagnosis                     | Congenital and developmental phenotypes                                             | Core psychiatric symptoms                                                             | Physical comorbidities                                                                                                          | Brain imaging/laboratory tests                             |
|-----------------------------|------------------|-----------------------------|-------------------------------------------|-------------------------------------------------------------------------------------|---------------------------------------------------------------------------------------|---------------------------------------------------------------------------------------------------------------------------------|------------------------------------------------------------|
| 22DS1/23/Male               | 22q11.2 deletion | chr22:17,271,966-19,961,412 | intellectual disability                   | tetralogy of Fallot, renal agenesis, cryptorchidism, motor and speech delay         | behavioral problems caused by hyperthyroidism                                         | idiopathic thrombocytopenic purpura, serous otitis media, destructive thyroiditis (hyperthyroidism), sensorineural hearing loss | MRI: mild cerebral atrophy                                 |
| 22DS2/42/Female             | 22q11.2 deletion | chr22:17,170,222-20,072,277 | schizophrenia, intellectual disability    | ventricular septal defect, cleft of soft palate, dysarthria, motor and speech delay | delusions, hallucinations, manic and depressive symptoms, temper outburst, excitement | hyperthyroidism, peroneal nerve paralysis, food allergy                                                                         | CT: frontal atrophy, bilateral basal ganglia calcification |
| 22DS3/23/F                  | 22q11.2 deletion | chr22:17,150,356-19,961,412 | Selective mutism, intellectual disability | speech delay, ventricular septal defect, cleft of palate                            | Failure to speak in specific social situations                                        | short stature, thyroid tumor                                                                                                    | MRI: no significant findings                               |
