# Supplementary material for: Chromosome 22q11.2 deletion causes PERK-dependent vulnerability in dopaminergic neurons
Source: PubMed Central journal article supplement — eBioMedicine. 2020 Dec 17;63:103138. doi: 10.1016/j.ebiom.2020.103138 (PMC7753137; doi:10.1016/j.ebiom.2020.103138), 2020-12-17
Supplement: mmc3.pdf [file mmc3.pdf]

Supplementary Table 2. 22DS group&lt;Control group

| Accession | Description                                                                                                                                        | MW [kDa] | Area            |                 |                 |                |                |                |
|-----------|----------------------------------------------------------------------------------------------------------------------------------------------------|----------|-----------------|-----------------|-----------------|----------------|----------------|----------------|
|           |                                                                                                                                                    |          | #01<br>Control1 | #02<br>Control2 | #03<br>Control3 | #04<br>22DS1_1 | #05<br>22DS2_1 | #06<br>22DS3_1 |
| Q6PJT7    | Zinc finger CCH domain-containing protein 14 OS=Homo sapiens GN=ZC3H14 PE=1 SV=1 - [ZC3HE_HUMAN]                                                   | 82.8     | 5.452E6         | 5.508E6         | 5.568E6         | 0.000E0        | 0.000E0        | 0.000E0        |
| Q92600    | Cell differentiation protein RCD1 homolog OS=Homo sapiens GN=RQCD1 PE=1 SV=1 - [RCD1_HUMAN]                                                        | 33.6     | 1.335E7         | 1.288E7         | 1.228E7         | 0.000E0        | 0.000E0        | 0.000E0        |
| Q9UEY8    | Gamma-adducin OS=Homo sapiens GN=ADD3 PE=1 SV=1 - [ADDG_HUMAN]                                                                                     | 79.1     | 1.362E7         | 1.466E7         | 1.356E7         | 0.000E0        | 0.000E0        | 0.000E0        |
| Q6YN16    | Hydroxysteroid dehydrogenase-like protein 2 OS=Homo sapiens GN=HSDL2 PE=1 SV=1 - [HSDL2_HUMAN]                                                     | 45.4     | 3.515E7         | 3.495E7         | 3.225E7         | 0.000E0        | 0.000E0        | 0.000E0        |
| Q9UBD5    | Origin recognition complex subunit 3 OS=Homo sapiens GN=ORC3 PE=1 SV=1 - [ORC3_HUMAN]                                                              | 82.2     | 1.217E7         | 1.365E7         | 1.288E7         | 0.000E0        | 0.000E0        | 0.000E0        |
| Q12974    | Protein tyrosine phosphatase type IVA 2 OS=Homo sapiens GN=PTP4A2 PE=1 SV=1 - [TP4A2_HUMAN]                                                        | 19.1     | 9.014E6         | 8.991E6         | 9.991E6         | 0.000E0        | 0.000E0        | 0.000E0        |
| P52756    | RNA-binding protein 5 OS=Homo sapiens GN=RBM5 PE=1 SV=2 - [RBM5_HUMAN]                                                                             | 92.1     | 1.093E7         | 9.640E6         | 1.025E7         | 0.000E0        | 0.000E0        | 0.000E0        |
| P56385    | ATP synthase subunit e, mitochondrial OS=Homo sapiens GN=ATP5I PE=1 SV=2 - [ATP5I_HUMAN]                                                           | 7.9      | 3.580E7         | 4.082E7         | 3.681E7         | 0.000E0        | 0.000E0        | 0.000E0        |
| Q9Y2D4    | Exocyst complex component 6B OS=Homo sapiens GN=EXOC6B PE=1 SV=3 - [EXC6B_HUMAN]                                                                   | 94.1     | 6.532E6         | 5.692E6         | 5.781E6         | 0.000E0        | 0.000E0        | 0.000E0        |
| O95155    | Ubiquitin conjugation factor E4 B OS=Homo sapiens GN=UBE4B PE=1 SV=1 - [UBE4B_HUMAN]                                                               | 146.1    | 4.958E8         | 4.424E8         | 5.190E8         | 0.000E0        | 0.000E0        | 0.000E0        |
| O75340    | Programmed cell death protein 6 OS=Homo sapiens GN=PDCC6 PE=1 SV=1 - [PDCC6_HUMAN]                                                                 | 21.9     | 7.486E7         | 6.373E7         | 7.261E7         | 0.000E0        | 0.000E0        | 0.000E0        |
| Q9H0R6    | Glutamyl-tRNA(Gln) amidotransferase subunit A, mitochondrial OS=Homo sapiens GN=QRSL1 PE=1 SV=2 - [GATA_HUMAN]                                     | 57.4     | 7.568E6         | 8.843E6         | 7.653E6         | 0.000E0        | 0.000E0        | 0.000E0        |
| P29323    | Ephrin type-B receptor 2 OS=Homo sapiens GN=EPHB2 PE=1 SV=5 - [EPHB2_HUMAN]                                                                        | 117.4    | 3.212E7         | 2.678E7         | 2.849E7         | 0.000E0        | 0.000E0        | 0.000E0        |
| Q29RF7    | Sister chromatid cohesion protein PDS5 homolog A OS=Homo sapiens GN=PDSSA PE=1 SV=1 - [PDS5A_HUMAN]                                                | 150.7    | 2.769E7         | 3.352E7         | 3.045E7         | 0.000E0        | 0.000E0        | 0.000E0        |
| P50336    | Protoporphyrinogen oxidase OS=Homo sapiens GN=PPOX PE=1 SV=1 - [PPOX_HUMAN]                                                                        | 50.7     | 1.766E7         | 1.456E7         | 1.661E7         | 0.000E0        | 0.000E0        | 0.000E0        |
| Q9H7Z7    | Prostaglandin E synthase 2 OS=Homo sapiens GN=PTGES2 PE=1 SV=1 - [PTGES2_HUMAN]                                                                    | 41.9     | 2.632E7         | 2.476E7         | 2.133E7         | 0.000E0        | 0.000E0        | 0.000E0        |
| Q9NRY5    | Protein FAM114A2 OS=Homo sapiens GN=FAM114A2 PE=1 SV=4 - [F1142_HUMAN]                                                                             | 55.4     | 8.833E6         | 1.074E7         | 1.079E7         | 0.000E0        | 0.000E0        | 0.000E0        |
| Q9C0E8    | Protein lunapark OS=Homo sapiens GN=LNP PE=1 SV=2 - [LNP_HUMAN]                                                                                    | 47.7     | 2.006E7         | 2.154E7         | 1.727E7         | 0.000E0        | 0.000E0        | 0.000E0        |
| P52434    | DNA-directed RNA polymerases I, II, and III subunit RPABC3 OS=Homo sapiens GN=POLR2H PE=1 SV=4 - [RPAB3_HUMAN]                                     | 17.1     | 1.823E7         | 1.623E7         | 2.031E7         | 0.000E0        | 0.000E0        | 0.000E0        |
| Q96TA1    | Niban-like protein 1 OS=Homo sapiens GN=FAM129B PE=1 SV=3 - [NIBL1_HUMAN]                                                                          | 84.1     | 1.001E7         | 1.257E7         | 1.167E7         | 0.000E0        | 0.000E0        | 0.000E0        |
| P48728    | Aminomethyltransferase, mitochondrial OS=Homo sapiens GN=AMT PE=1 SV=1 - [GCST_HUMAN]                                                              | 43.9     | 7.981E6         | 7.047E6         | 6.308E6         | 0.000E0        | 0.000E0        | 0.000E0        |
| Q9BRJ7    | Protein syndesmos OS=Homo sapiens GN=NUDT16L1 PE=1 SV=1 - [SDOS_HUMAN]                                                                             | 23.3     | 5.064E6         | 6.432E6         | 5.619E6         | 0.000E0        | 0.000E0        | 0.000E0        |
| Q5T160    | Probable arginine-tRNA ligase, mitochondrial OS=Homo sapiens GN=RARS2 PE=1 SV=1 - [SYRM_HUMAN]                                                     | 65.5     | 7.609E6         | 9.739E6         | 8.866E6         | 0.000E0        | 0.000E0        | 0.000E0        |
| Q9BW72    | HIG1 domain family member 2A, mitochondrial OS=Homo sapiens GN=HIGD2A PE=1 SV=1 - [HIG2A_HUMAN]                                                    | 11.5     | 1.135E8         | 9.546E7         | 9.022E7         | 0.000E0        | 0.000E0        | 0.000E0        |
| P98164    | Low-density lipoprotein receptor-related protein 2 OS=Homo sapiens GN=LRP2 PE=1 SV=3 - [LRP2_HUMAN]                                                | 521.6    | 1.799E7         | 2.316E7         | 2.078E7         | 0.000E0        | 0.000E0        | 0.000E0        |
| Q15349    | Ribosomal protein S6 kinase alpha-2 OS=Homo sapiens GN=RPS6KA2 PE=1 SV=2 - [KS6A2_HUMAN]                                                           | 83.2     | 5.038E6         | 4.064E6         | 5.179E6         | 0.000E0        | 0.000E0        | 0.000E0        |
| Q8NHP6    | Motile sperm domain-containing protein 2 OS=Homo sapiens GN=MOSPD2 PE=1 SV=1 - [MSPD2_HUMAN]                                                       | 59.7     | 3.865E7         | 3.861E7         | 3.049E7         | 0.000E0        | 0.000E0        | 0.000E0        |
| Q14839    | Chromodomain-helicase-DNA-binding protein 4 OS=Homo sapiens GN=CHD4 PE=1 SV=2 - [CHD4_HUMAN]                                                       | 217.9    | 5.524E7         | 4.577E7         | 4.284E7         | 0.000E0        | 0.000E0        | 0.000E0        |
| Q96A26    | Protein FAM162A OS=Homo sapiens GN=FAM162A PE=1 SV=2 - [F162A_HUMAN]                                                                               | 17.3     | 2.841E7         | 3.679E7         | 3.583E7         | 0.000E0        | 0.000E0        | 0.000E0        |
| Q99459    | Cell division cycle 5-like protein OS=Homo sapiens GN=CDC5L PE=1 SV=2 - [CDC5L_HUMAN]                                                              | 92.2     | 4.728E7         | 6.104E7         | 4.958E7         | 0.000E0        | 0.000E0        | 0.000E0        |
| Q9Y3D6    | Mitochondrial fission 1 protein OS=Homo sapiens GN=FIS1 PE=1 SV=2 - [FIS1_HUMAN]                                                                   | 16.9     | 4.273E7         | 3.271E7         | 3.530E7         | 0.000E0        | 0.000E0        | 0.000E0        |
| Q9UPY8    | Microtubule-associated protein RP/EB family member 3 OS=Homo sapiens GN=MAPRE3 PE=1 SV=1 - [MARE3_HUMAN]                                           | 32.0     | 2.142E7         | 2.691E7         | 2.097E7         | 0.000E0        | 0.000E0        | 0.000E0        |
| Q9HB90    | Ras-related GTP-binding protein C OS=Homo sapiens GN=RRAGC PE=1 SV=1 - [RRAGC_HUMAN]                                                               | 44.2     | 8.866E6         | 9.284E6         | 6.999E6         | 0.000E0        | 0.000E0        | 0.000E0        |
| O60264    | SWI/SNF-related matrix-associated actin-dependent regulator of chromatin subfamily A member 5 OS=Homo sapiens GN=SMARCA5 PE=1 SV=1 - [SMCA5_HUMAN] | 121.8    | 4.919E7         | 4.387E7         | 3.644E7         | 0.000E0        | 0.000E0        | 0.000E0        |
| Q9NX62    | Inositol monophosphatase 3 OS=Homo sapiens GN=IMPAD1 PE=1 SV=1 - [IMPA3_HUMAN]                                                                     | 38.7     | 4.526E7         | 5.382E7         | 3.969E7         | 0.000E0        | 0.000E0        | 0.000E0        |
| Q6P3R8    | Serine/threonine-protein kinase Nek5 OS=Homo sapiens GN=NEK5 PE=2 SV=1 - [NEK5_HUMAN]                                                              | 81.4     | 1.406E7         | 1.132E7         | 1.040E7         | 0.000E0        | 0.000E0        | 0.000E0        |
| Q15120    | [Pyruvate dehydrogenase (acetyl-transferring)] kinase isozyme 3, mitochondrial OS=Homo sapiens GN=PKD3 PE=1 SV=1 - [PKD3_HUMAN]                    | 46.9     | 4.129E6         | 3.611E6         | 4.964E6         | 0.000E0        | 0.000E0        | 0.000E0        |
| O94829    | Importin-13 OS=Homo sapiens GN=IPO13 PE=1 SV=3 - [IPO13_HUMAN]                                                                                     | 108.1    | 2.464E6         | 2.438E6         | 1.821E6         | 0.000E0        | 0.000E0        | 0.000E0        |
| Q9Y2W2    | WW domain-binding protein 11 OS=Homo sapiens GN=WBP11 PE=1 SV=1 - [WBP11_HUMAN]                                                                    | 70.0     | 1.155E7         | 8.332E6         | 9.735E6         | 0.000E0        | 0.000E0        | 0.000E0        |
| O95470    | Sphingosine-1-phosphate lyase 1 OS=Homo sapiens GN=SGPL1 PE=1 SV=3 - [SGPL1_HUMAN]                                                                 | 63.5     | 1.056E8         | 1.071E8         | 7.780E7         | 0.000E0        | 0.000E0        | 0.000E0        |
| Q9BZE1    | 39S ribosomal protein L37, mitochondrial OS=Homo sapiens GN=MRPL37 PE=1 SV=2 - [RM37_HUMAN]                                                        | 48.1     | 2.599E7         | 2.449E7         | 1.857E7         | 0.000E0        | 0.000E0        | 0.000E0        |
| P30519    | Heme oxygenase 2 OS=Homo sapiens GN=HMOX2 PE=1 SV=2 - [HMOX2_HUMAN]                                                                                | 36.0     | 1.657E7         | 1.929E7         | 1.364E7         | 0.000E0        | 0.000E0        | 0.000E0        |
| Q9BQ69    | O-acetyl-ADP-ribose deacetylase MACROD1 OS=Homo sapiens GN=MACROD1 PE=1 SV=2 - [MACD1_HUMAN]                                                       | 35.5     | 1.091E7         | 1.133E7         | 8.114E6         | 0.000E0        | 0.000E0        | 0.000E0        |
| O75427    | Leucine-rich repeat and calponin homology domain-containing protein 4 OS=Homo sapiens GN=LRCH4 PE=1 SV=2 - [LRCH4_HUMAN]                           | 73.4     | 9.946E6         | 1.053E7         | 7.436E6         | 0.000E0        | 0.000E0        | 0.000E0        |
| Q9HC35    | Echinoderm microtubule-associated protein-like 4 OS=Homo sapiens GN=EML4 PE=1 SV=3 - [EMAL4_HUMAN]                                                 | 108.8    | 1.997E7         | 2.848E7         | 2.639E7         | 0.000E0        | 0.000E0        | 0.000E0        |
| Q9UMF0    | Intercellular adhesion molecule 5 OS=Homo sapiens GN=ICAM5 PE=1 SV=3 - [ICAM5_HUMAN]                                                               | 97.1     | 5.166E7         | 7.394E7         | 6.785E7         | 0.000E0        | 0.000E0        | 0.000E0        |
| O60610    | Protein diaphanous homolog 1 OS=Homo sapiens GN=DIAPH1 PE=1 SV=2 - [DIAP1_HUMAN]                                                                   | 141.3    | 7.769E7         | 1.038E8         | 7.667E7         | 0.000E0        | 0.000E0        | 0.000E0        |
| O14497    | AT-rich interactive domain-containing protein 1A OS=Homo sapiens GN=ARID1A PE=1 SV=3 - [AR1A_HUMAN]                                                | 241.9    | 5.132E7         | 6.042E7         | 7.331E7         | 0.000E0        | 0.000E0        | 0.000E0        |
| Q96A06    | Pre-B-cell leukemia transcription factor-interacting protein 1 OS=Homo sapiens GN=PBXIP1 PE=1 SV=1 - [PBIP1_HUMAN]                                 | 80.6     | 2.501E7         | 3.523E7         | 2.776E7         | 0.000E0        | 0.000E0        | 0.000E0        |
| Q9H2G2    | STE20-like serine/threonine-protein kinase OS=Homo sapiens GN=SLK PE=1 SV=1 - [SLK_HUMAN]                                                          | 142.6    | 8.822E6         | 1.050E7         | 7.290E6         | 0.000E0        | 0.000E0        | 0.000E0        |
| Q9BTU6    | Phosphatidylinositol 4-kinase type 2-alpha OS=Homo sapiens GN=PI4K2A PE=1 SV=1 - [P4K2A_HUMAN]                                                     | 54.0     | 4.505E6         | 6.495E6         | 6.086E6         | 0.000E0        | 0.000E0        | 0.000E0        |
| Q9H4A6    | Golgi phosphoprotein 3 OS=Homo sapiens GN=GOLPH3 PE=1 SV=1 - [GOLP3_HUMAN]                                                                         | 33.8     | 1.437E7         | 1.536E7         | 1.051E7         | 0.000E0        | 0.000E0        | 0.000E0        |
| Q9HCU4    | Cadherin EGF LAG seven-pass G-type receptor 2 OS=Homo sapiens GN=CELSR2 PE=1 SV=1 - [CELR2_HUMAN]                                                  | 317.3    | 1.444E7         | 1.111E7         | 1.005E7         | 0.000E0        | 0.000E0        | 0.000E0        |
| P50895    | Basal cell adhesion molecule OS=Homo sapiens GN=BCAM PE=1 SV=2 - [BCAM_HUMAN]                                                                      | 67.4     | 4.323E6         | 2.951E6         | 4.143E6         | 0.000E0        | 0.000E0        | 0.000E0        |
| Q92785    | Zinc finger protein ubi-d4 OS=Homo sapiens GN=DPF2 PE=1 SV=2 - [REQU_HUMAN]                                                                        | 44.1     | 9.381E6         | 1.000E7         | 6.737E6         | 0.000E0        | 0.000E0        | 0.000E0        |
| P54619    | 5'-AMP-activated protein kinase subunit gamma-1 OS=Homo sapiens GN=PRKAG1 PE=1 SV=1 - [AAKG1_HUMAN]                                                | 37.6     | 5.485E6         | 8.153E6         | 6.475E6         | 0.000E0        | 0.000E0        | 0.000E0        |
| Q9BQB6    | Vitamin K epoxide reductase complex subunit 1 OS=Homo sapiens GN=VKORC1 PE=1 SV=1 - [VKOR1_HUMAN]                                                  | 18.2     | 3.039E7         | 2.844E7         | 2.027E7         | 0.000E0        | 0.000E0        | 0.000E0        |
| Q8NFV4    | Alpha/beta hydrolase domain-containing protein 11 OS=Homo sapiens GN=ABHD11 PE=2 SV=1 - [ABHDB_HUMAN]                                              | 34.7     | 1.136E7         | 1.199E7         | 1.632E7         | 0.000E0        | 0.000E0        | 0.000E0        |
| Q92620    | Pre-mRNA-splicing factor ATP-dependent RNA helicase PRP16 OS=Homo sapiens GN=DHX38 PE=1 SV=2 - [PRP16_HUMAN]                                       | 140.4    | 7.682E6         | 5.824E6         | 5.230E6         | 0.000E0        | 0.000E0        | 0.000E0        |
| P50148    | Guanine nucleotide-binding protein G(q) subunit alpha OS=Homo sapiens GN=GNAQ PE=1 SV=4 - [GNAQ_HUMAN]                                             | 42.1     | 1.562E7         | 1.582E7         | 1.074E7         | 0.000E0        | 0.000E0        | 0.000E0        |
| Q9Y3C0    | WASH complex subunit CCDC53 OS=Homo sapiens GN=CCDC53 PE=1 SV=1 - [CCD53_HUMAN]                                                                    | 21.2     | 5.776E6         | 8.677E6         | 6.899E6         | 0.000E0        | 0.000E0        | 0.000E0        |
| O95983    | Methyl-CpG-binding domain protein 3 OS=Homo sapiens GN=MBD3 PE=1 SV=1 - [MBD3_HUMAN]                                                               | 32.8     | 1.163E7         | 1.082E7         | 7.692E6         | 0.000E0        | 0.000E0        | 0.000E0        |
| Q7Z7H8    | 39S ribosomal protein L10, mitochondrial OS=Homo sapiens GN=MRPL10 PE=1 SV=3 - [RM10_HUMAN]                                                        | 29.3     | 2.561E7         | 2.070E7         | 1.688E7         | 0.000E0        | 0.000E0        | 0.000E0        |
| Q9Y5Q9    | General transcription factor 3C polypeptide 3 OS=Homo sapiens GN=GTF3C3 PE=1 SV=1 - [TF3C3_HUMAN]                                                  | 101.2    | 1.595E7         | 1.426E7         | 1.043E7         | 0.000E0        | 0.000E0        | 0.000E0        |
| P48059    | LIM and senescent cell antigen-like-containing domain protein 1 OS=Homo sapiens GN=LIMS1 PE=1 SV=4 - [LIMS1_HUMAN]                                 | 37.2     | 1.588E7         | 1.829E7         | 2.382E7         | 0.000E0        | 0.000E0        | 0.000E0        |
| Q96AX1    | Vacuolar protein sorting-associated protein 33A OS=Homo sapiens GN=VPS33A PE=1 SV=1 - [VP33A_HUMAN]                                                | 67.6     | 5.987E6         | 9.025E6         | 6.982E6         | 0.000E0        | 0.000E0        | 0.000E0        |
| Q27J81    | Inverted formin-2 OS=Homo sapiens GN=INF2 PE=1 SV=2 - [INF2_HUMAN]                                                                                 | 135.5    | 5.672E6         | 7.113E6         | 4.662E6         | 0.000E0        | 0.000E0        | 0.000E0        |
| P60604    | Ubiquitin-conjugating enzyme E2 G2 OS=Homo sapiens GN=UBE2G2 PE=1 SV=1 - [UB2G2_HUMAN]                                                             | 18.6     | 2.400E7         | 1.972E7         | 1.562E7         | 0.000E0        | 0.000E0        | 0.000E0        |
| O95837    | Guanine nucleotide-binding protein subunit alpha-14 OS=Homo sapiens GN=GNA14 PE=1 SV=1 - [GNA14_HUMAN]                                             | 41.5     | 1.341E7         | 1.212E7         | 8.649E6         | 0.000E0        | 0.000E0        | 0.000E0        |
| Q8N5Z0    | Kynurenine/alpha-aminoacidate aminotransferase, mitochondrial OS=Homo sapiens GN=AADAT PE=1 SV=2 - [AADAT_HUMAN]                                   | 47.3     | 7.665E6         | 1.150E7         | 8.568E6         | 0.000E0        | 0.000E0        | 0.000E0        |
| Q9NWX8    | BRISCA and BRCA1-A complex member 1 OS=Homo sapiens GN=BABAM1 PE=1 SV=1 - [BABA1_HUMAN]                                                            | 36.5     | 4.012E6         | 6.255E6         | 5.126E6         | 0.000E0        | 0.000E0        | 0.000E0        |
| Q8IWS0    | PHD finger protein 6 OS=Homo sapiens GN=PHF6 PE=1 SV=1 - [PHF6_HUMAN]                                                                              | 41.3     | 1.188E7         | 9.396E6         | 7.496E6         | 0.000E0        | 0.000E0        | 0.000E0        |
| P22694    | cAMP-dependent protein kinase catalytic subunit beta OS=Homo sapiens GN=PRKACB PE=1 SV=2 - [KAPCB_HUMAN]                                           | 40.6     | 1.751E7         | 2.583E7         | 1.757E7         | 0.000E0        | 0.000E0        | 0.000E0        |
| Q8NBM8    | Preylcysteine oxidase-like OS=Homo sapiens GN=PCYOX1L PE=1 SV=2 - [PCYXL_HUMAN]                                                                    | 54.6     | 2.112E7         | 1.937E7         | 1.302E7         | 0.000E0        | 0.000E0        | 0.000E0        |
| Q9NRX2    | 39S ribosomal protein L17, mitochondrial OS=Homo sapiens GN=MRPL17 PE=1 SV=1 - [RM17_HUMAN]                                                        | 20.0     | 6.534E6         | 1.034E7         | 7.633E6         | 0.000E0        | 0.000E0        | 0.000E0        |
| O15270    | Serine palmitoyltransferase 2 OS=Homo sapiens GN=SPTLC2 PE=1 SV=1 - [SPTC2_HUMAN]                                                                  | 62.9     | 5.706E7         | 8.205E7         | 5.371E7         | 0.000E0        | 0.000E0        | 0.000E0        |
| Q9UM54    | Unconventional myosin-VI OS=Homo sapiens GN=MYO6 PE=1 SV=4 - [MYO6_HUMAN]                                                                          | 149.6    | 8.382E6         | 9.675E6         | 5.871E6         | 0.000E0        | 0.000E0        | 0.000E0        |
| O15091    | Mitochondrial ribonuclease P protein 3 OS=Homo sapiens GN=KIAA0391 PE=1 SV=2 - [MRRP3_HUMAN]                                                       | 67.3     | 5.801E6         | 6.969E6         | 4.228E6         | 0.000E0        | 0.000E0        | 0.000E0        |

|        |                                                                                                                                                    |       |         |         |         |         |         |         |
|--------|----------------------------------------------------------------------------------------------------------------------------------------------------|-------|---------|---------|---------|---------|---------|---------|
| Q9BXK5 | Bcl-2-like protein 13 OS=Homo sapiens GN=BCL2L13 PE=1 SV=1 - [B2L13_HUMAN]                                                                         | 52.7  | 2.522E7 | 1.809E7 | 1.607E7 | 0.000E0 | 0.000E0 | 0.000E0 |
| Q71SY5 | Mediator of RNA polymerase II transcription subunit 25 OS=Homo sapiens GN=MED25 PE=1 SV=2 - [MED25_HUMAN]                                          | 78.1  | 5.045E6 | 5.387E6 | 3.312E6 | 0.000E0 | 0.000E0 | 0.000E0 |
| P49427 | Ubiquitin-conjugating enzyme E2 R1 OS=Homo sapiens GN=CDC34 PE=1 SV=2 - [UB2R1_HUMAN]                                                              | 26.7  | 1.364E7 | 1.333E7 | 8.501E6 | 0.000E0 | 0.000E0 | 0.000E0 |
| Q969V3 | Nicalin OS=Homo sapiens GN=NCLN PE=1 SV=2 - [NCLN_HUMAN]                                                                                           | 62.9  | 5.938E7 | 4.274E7 | 7.123E7 | 0.000E0 | 0.000E0 | 0.000E0 |
| Q68EM7 | Rho GTPase-activating protein 17 OS=Homo sapiens GN=ARHGAP17 PE=1 SV=1 - [RHG17_HUMAN]                                                             | 95.4  | 1.140E8 | 9.610E7 | 6.818E7 | 0.000E0 | 0.000E0 | 0.000E0 |
| P43007 | Neutral amino acid transporter A OS=Homo sapiens GN=SLC1A4 PE=1 SV=1 - [SATT_HUMAN]                                                                | 55.7  | 1.865E7 | 1.122E7 | 1.479E7 | 0.000E0 | 0.000E0 | 0.000E0 |
| O00505 | Importin subunit alpha-4 OS=Homo sapiens GN=KPNA3 PE=1 SV=2 - [IMA4_HUMAN]                                                                         | 57.8  | 3.037E7 | 3.668E7 | 2.163E7 | 0.000E0 | 0.000E0 | 0.000E0 |
| Q9UJX3 | Anaphase-promoting complex subunit 7 OS=Homo sapiens GN=ANAPC7 PE=1 SV=4 - [APC7_HUMAN]                                                            | 66.8  | 9.835E6 | 7.952E6 | 5.799E6 | 0.000E0 | 0.000E0 | 0.000E0 |
| Q8N6T3 | ADP-ribosylation factor GTPase-activating protein 1 OS=Homo sapiens GN=ARFGAP1 PE=1 SV=2 - [ARFG1_HUMAN]                                           | 44.6  | 1.155E7 | 1.470E7 | 8.684E6 | 0.000E0 | 0.000E0 | 0.000E0 |
| Q6P1J9 | Parafibromin OS=Homo sapiens GN=CDC73 PE=1 SV=1 - [CDC73_HUMAN]                                                                                    | 60.5  | 1.322E7 | 1.092E7 | 7.727E6 | 0.000E0 | 0.000E0 | 0.000E0 |
| Q96QC0 | Serine/threonine-protein phosphatase 1 regulatory subunit 10 OS=Homo sapiens GN=PPP1R10 PE=1 SV=1 - [PP1RA_HUMAN]                                  | 99.0  | 1.711E7 | 1.074E7 | 1.814E7 | 0.000E0 | 0.000E0 | 0.000E0 |
| Q9P253 | Vacuolar protein sorting-associated protein 18 homolog OS=Homo sapiens GN=VPS18 PE=1 SV=2 - [VPS18_HUMAN]                                          | 110.1 | 8.921E6 | 7.616E6 | 5.186E6 | 0.000E0 | 0.000E0 | 0.000E0 |
| Q6DKK2 | Tetratricopeptide repeat protein 19, mitochondrial OS=Homo sapiens GN=TTC19 PE=1 SV=4 - [TTC19_HUMAN]                                              | 42.4  | 6.898E6 | 1.117E7 | 1.162E7 | 0.000E0 | 0.000E0 | 0.000E0 |
| Q9HCM4 | Band 4.1-like protein 5 OS=Homo sapiens GN=EPB41L5 PE=1 SV=3 - [E41L5_HUMAN]                                                                       | 81.8  | 7.145E6 | 6.942E6 | 4.215E6 | 0.000E0 | 0.000E0 | 0.000E0 |
| Q8N999 | Uncharacterized protein C12orf29 OS=Homo sapiens GN=C12orf29 PE=1 SV=2 - [CL029_HUMAN]                                                             | 37.5  | 9.283E6 | 1.424E7 | 9.067E6 | 0.000E0 | 0.000E0 | 0.000E0 |
| P04216 | Thy-1 membrane glycoprotein OS=Homo sapiens GN=THY1 PE=1 SV=2 - [THY1_HUMAN]                                                                       | 17.9  | 2.110E7 | 2.460E7 | 1.401E7 | 0.000E0 | 0.000E0 | 0.000E0 |
| Q8NB37 | Parkinson disease 7 domain-containing protein 1 OS=Homo sapiens GN=PDDC1 PE=1 SV=1 - [PDDC1_HUMAN]                                                 | 23.3  | 1.012E7 | 1.761E7 | 1.366E7 | 0.000E0 | 0.000E0 | 0.000E0 |
| P51553 | Isocitrate dehydrogenase [NAD] subunit gamma, mitochondrial OS=Homo sapiens GN=IDH3G PE=1 SV=1 - [IDH3G_HUMAN]                                     | 42.8  | 1.147E7 | 7.188E6 | 1.261E7 | 0.000E0 | 0.000E0 | 0.000E0 |
| P18031 | Tyrosine-protein phosphatase non-receptor type 1 OS=Homo sapiens GN=PTPN1 PE=1 SV=1 - [PTN1_HUMAN]                                                 | 49.9  | 3.933E7 | 3.805E7 | 2.269E7 | 0.000E0 | 0.000E0 | 0.000E0 |
| Q08431 | Lactadherin OS=Homo sapiens GN=OX=9606 GN=MFG8 PE=1 SV=3 - [MFGM_HUMAN]                                                                            | 43.1  | 3.088E7 | 1.948E7 | 1.977E7 | 0.000E0 | 0.000E0 | 0.000E0 |
| Q96KG9 | N-terminal kinase-like protein OS=Homo sapiens GN=SCYL1 PE=1 SV=1 - [NTKL_HUMAN]                                                                   | 89.6  | 6.420E6 | 1.141E7 | 8.991E6 | 0.000E0 | 0.000E0 | 0.000E0 |
| Q12846 | Syntaxin-4 OS=Homo sapiens GN=STX4 PE=1 SV=2 - [STX4_HUMAN]                                                                                        | 34.2  | 3.521E6 | 4.673E6 | 2.654E6 | 0.000E0 | 0.000E0 | 0.000E0 |
| Q99943 | 1-acyl-sn-glycerol-3-phosphate acyltransferase alpha OS=Homo sapiens GN=AGPAT1 PE=1 SV=2 - [PLCA_HUMAN]                                            | 31.7  | 3.987E7 | 3.031E7 | 2.253E7 | 0.000E0 | 0.000E0 | 0.000E0 |
| P45985 | Dual specificity mitogen-activated protein kinase kinase 4 OS=Homo sapiens GN=MAP2K4 PE=1 SV=1 - [MP2K4_HUMAN]                                     | 44.3  | 1.285E7 | 1.016E7 | 7.187E6 | 0.000E0 | 0.000E0 | 0.000E0 |
| P09669 | Cytochrome c oxidase subunit 6C OS=Homo sapiens GN=COX6C PE=1 SV=2 - [COX6C_HUMAN]                                                                 | 8.8   | 4.101E7 | 2.321E7 | 3.072E7 | 0.000E0 | 0.000E0 | 0.000E0 |
| Q9NZV5 | Selenoprotein N OS=Homo sapiens GN=SELENON PE=1 SV=5 - [SELN_HUMAN]                                                                                | 65.8  | 7.325E6 | 7.437E6 | 4.275E6 | 0.000E0 | 0.000E0 | 0.000E0 |
| Q92692 | Nectin-2 OS=Homo sapiens GN=NECTIN2 PE=1 SV=1 - [NECT2_HUMAN]                                                                                      | 57.7  | 3.699E7 | 2.126E7 | 2.660E7 | 0.000E0 | 0.000E0 | 0.000E0 |
| Q13084 | 39S ribosomal protein L28, mitochondrial OS=Homo sapiens GN=MRPL28 PE=1 SV=4 - [RM28_HUMAN]                                                        | 30.1  | 7.914E6 | 1.312E7 | 8.661E6 | 0.000E0 | 0.000E0 | 0.000E0 |
| Q96GM5 | SWI/SNF-related matrix-associated actin-dependent regulator of chromatin subfamily D member 1 OS=Homo sapiens GN=SMARCD1 PE=1 SV=2 - [SMRD1_HUMAN] | 58.2  | 7.057E7 | 1.271E8 | 1.006E8 | 0.000E0 | 0.000E0 | 0.000E0 |
| Q9H6R3 | Acyl-CoA synthetase short-chain family member 3, mitochondrial OS=Homo sapiens GN=ACSS3 PE=1 SV=1 - [ACSS3_HUMAN]                                  | 74.7  | 3.467E7 | 3.599E7 | 2.040E7 | 0.000E0 | 0.000E0 | 0.000E0 |
| O00186 | Syntaxin-binding protein 3 OS=Homo sapiens GN=STXB3 PE=1 SV=2 - [STXB3_HUMAN]                                                                      | 67.7  | 9.205E6 | 6.481E6 | 5.263E6 | 0.000E0 | 0.000E0 | 0.000E0 |
| Q9UF83 | Uncharacterized protein DKFZp434B061 OS=Homo sapiens PE=2 SV=2 - [YM012_HUMAN]                                                                     | 59.4  | 2.727E7 | 4.838E7 | 3.409E7 | 0.000E0 | 0.000E0 | 0.000E0 |
| Q8IWA5 | Choline transporter-like protein 2 OS=Homo sapiens GN=SLC44A2 PE=1 SV=3 - [CTL2_HUMAN]                                                             | 80.1  | 3.674E7 | 5.768E7 | 3.471E7 | 0.000E0 | 0.000E0 | 0.000E0 |
| P40763 | Signal transducer and activator of transcription 3 OS=Homo sapiens GN=STAT3 PE=1 SV=2 - [STAT3_HUMAN]                                              | 88.0  | 8.574E6 | 4.775E6 | 8.405E6 | 0.000E0 | 0.000E0 | 0.000E0 |
| Q15382 | GTP-binding protein Rheb OS=Homo sapiens GN=RHEB PE=1 SV=1 - [RHEB_HUMAN]                                                                          | 20.5  | 2.492E7 | 4.582E7 | 4.212E7 | 0.000E0 | 0.000E0 | 0.000E0 |
| Q8IXH7 | Negative elongation factor C/D OS=Homo sapiens GN=NELFCD PE=1 SV=2 - [NELFD_HUMAN]                                                                 | 66.2  | 6.446E6 | 1.099E7 | 7.179E6 | 0.000E0 | 0.000E0 | 0.000E0 |
| Q9C040 | Tripalmitolein-containing protein 2 OS=Homo sapiens GN=TRIM2 PE=1 SV=1 - [TRIM2_HUMAN]                                                             | 81.5  | 6.450E6 | 1.190E7 | 8.872E6 | 0.000E0 | 0.000E0 | 0.000E0 |
| O95487 | Protein transport protein Sec24B OS=Homo sapiens GN=SEC24B PE=1 SV=2 - [SC24B_HUMAN]                                                               | 137.3 | 5.717E6 | 4.705E6 | 8.357E6 | 0.000E0 | 0.000E0 | 0.000E0 |
| P29992 | Guanine nucleotide-binding protein subunit alpha-11 OS=Homo sapiens GN=GNA11 PE=1 SV=2 - [GNA11_HUMAN]                                             | 42.1  | 1.903E7 | 1.666E7 | 1.010E7 | 0.000E0 | 0.000E0 | 0.000E0 |
| Q9NZ32 | Actin-related protein 10 OS=Homo sapiens GN=ACTR10 PE=1 SV=1 - [ARP10_HUMAN]                                                                       | 46.3  | 1.305E7 | 1.508E7 | 7.965E6 | 0.000E0 | 0.000E0 | 0.000E0 |
| O00170 | AH receptor-interacting protein OS=Homo sapiens GN=AIP PE=1 SV=2 - [AIP_HUMAN]                                                                     | 37.6  | 1.055E7 | 1.789E7 | 1.129E7 | 0.000E0 | 0.000E0 | 0.000E0 |
| Q86YD1 | Prostate tumor-overexpressed gene 1 protein OS=Homo sapiens GN=PTOV1 PE=1 SV=1 - [PTOV1_HUMAN]                                                     | 46.8  | 6.061E6 | 4.306E6 | 3.312E6 | 0.000E0 | 0.000E0 | 0.000E0 |
| P35250 | Replication factor C subunit 2 OS=Homo sapiens GN=RFC2 PE=1 SV=3 - [RFC2_HUMAN]                                                                    | 39.1  | 1.581E7 | 1.726E7 | 9.135E6 | 0.000E0 | 0.000E0 | 0.000E0 |
| P61011 | Signal recognition particle 54 kDa protein OS=Homo sapiens GN=SRP54 PE=1 SV=1 - [SRP54_HUMAN]                                                      | 55.7  | 1.986E7 | 2.327E7 | 1.211E7 | 0.000E0 | 0.000E0 | 0.000E0 |
| Q8NBN3 | Transmembrane protein 87A OS=Homo sapiens GN=TMEM87A PE=1 SV=3 - [TM87A_HUMAN]                                                                     | 63.4  | 2.932E7 | 5.422E7 | 3.828E7 | 0.000E0 | 0.000E0 | 0.000E0 |
| O60832 | H/AcA ribonucleoprotein complex subunit 4 OS=Homo sapiens GN=DKC1 PE=1 SV=3 - [DKC1_HUMAN]                                                         | 57.6  | 1.374E7 | 1.039E7 | 7.237E6 | 0.000E0 | 0.000E0 | 0.000E0 |
| P54753 | Ephrin type-B receptor 3 OS=Homo sapiens GN=EPHB3 PE=1 SV=2 - [EPHB3_HUMAN]                                                                        | 110.3 | 3.162E7 | 5.500E7 | 6.020E7 | 0.000E0 | 0.000E0 | 0.000E0 |
| P60201 | Myelin proteolipid protein OS=Homo sapiens GN=PLP1 PE=1 SV=2 - [MYPR_HUMAN]                                                                        | 30.1  | 2.280E7 | 1.188E7 | 1.809E7 | 0.000E0 | 0.000E0 | 0.000E0 |
| Q92538 | Golgi-specific brefeldin A-resistance guanine nucleotide exchange factor 1 OS=Homo sapiens GN=GBF1 PE=1 SV=2 - [GBF1_HUMAN]                        | 206.3 | 9.234E6 | 1.444E7 | 8.210E6 | 0.000E0 | 0.000E0 | 0.000E0 |
| Q93034 | Cullin-5 OS=Homo sapiens GN=CUL5 PE=1 SV=4 - [CUL5_HUMAN]                                                                                          | 90.9  | 6.069E6 | 1.119E7 | 7.684E6 | 0.000E0 | 0.000E0 | 0.000E0 |
| Q96A65 | Exocyst complex component 4 OS=Homo sapiens GN=EXOC4 PE=1 SV=1 - [EXOC4_HUMAN]                                                                     | 110.4 | 4.737E6 | 6.742E6 | 3.597E6 | 0.000E0 | 0.000E0 | 0.000E0 |
| Q8IWX3 | Ankyrin repeat and KH domain-containing protein 1 OS=Homo sapiens GN=ANKHD1 PE=1 SV=1 - [ANKH1_HUMAN]                                              | 269.3 | 1.235E7 | 2.442E7 | 1.974E7 | 0.000E0 | 0.000E0 | 0.000E0 |
| P48426 | Phosphatidylinositol 5-phosphate 4-kinase type-2 alpha OS=Homo sapiens GN=PIP4K2A PE=1 SV=2 - [PI42A_HUMAN]                                        | 46.2  | 8.898E6 | 1.570E7 | 9.729E6 | 0.000E0 | 0.000E0 | 0.000E0 |
| Q96T76 | MMS19 nucleotide excision repair protein homolog OS=Homo sapiens GN=MMS19 PE=1 SV=2 - [MMS19_HUMAN]                                                | 113.2 | 2.334E7 | 1.306E7 | 1.441E7 | 0.000E0 | 0.000E0 | 0.000E0 |
| O00192 | Armadillo repeat protein deleted in velo-cardio-facial syndrome OS=Homo sapiens GN=ARVCF PE=1 SV=1 - [ARVC_HUMAN]                                  | 104.6 | 4.446E7 | 8.827E7 | 6.391E7 | 0.000E0 | 0.000E0 | 0.000E0 |
| Q9Y399 | 28S ribosomal protein S2, mitochondrial OS=Homo sapiens GN=MRPS2 PE=1 SV=1 - [RT02_HUMAN]                                                          | 33.2  | 1.725E7 | 1.479E7 | 8.463E6 | 0.000E0 | 0.000E0 | 0.000E0 |
| Q712K3 | Ubiquitin-conjugating enzyme E2 R2 OS=Homo sapiens GN=UBE2R2 PE=1 SV=1 - [UB2R2_HUMAN]                                                             | 27.1  | 1.512E7 | 1.901E7 | 9.322E6 | 0.000E0 | 0.000E0 | 0.000E0 |
| P18858 | DNA ligase 1 OS=Homo sapiens GN=LIG1 PE=1 SV=1 - [DNL1_HUMAN]                                                                                      | 101.7 | 3.244E7 | 5.453E7 | 3.083E7 | 0.000E0 | 0.000E0 | 0.000E0 |
| Q9Y625 | Glypican-6 OS=Homo sapiens GN=GPC6 PE=1 SV=1 - [GPC6_HUMAN]                                                                                        | 62.7  | 7.912E7 | 4.146E7 | 5.200E7 | 0.000E0 | 0.000E0 | 0.000E0 |
| Q96JJ3 | Engulfment and cell motility protein 2 OS=Homo sapiens GN=ELMO2 PE=1 SV=2 - [ELMO2_HUMAN]                                                          | 82.6  | 4.193E6 | 6.537E6 | 3.472E6 | 0.000E0 | 0.000E0 | 0.000E0 |
| Q99986 | Serine/threonine-protein kinase VRK1 OS=Homo sapiens GN=VRK1 PE=1 SV=1 - [VRK1_HUMAN]                                                              | 45.4  | 1.507E7 | 9.456E6 | 8.106E6 | 0.000E0 | 0.000E0 | 0.000E0 |
| P35270 | Sepiapterin reductase OS=Homo sapiens GN=SPR PE=1 SV=1 - [SPRE_HUMAN]                                                                              | 28.0  | 7.087E6 | 5.569E6 | 1.072E7 | 0.000E0 | 0.000E0 | 0.000E0 |
| Q9UPT5 | Exocyst complex component 7 OS=Homo sapiens GN=EXOC7 PE=1 SV=3 - [EXOC7_HUMAN]                                                                     | 83.3  | 6.611E6 | 8.801E6 | 4.318E6 | 0.000E0 | 0.000E0 | 0.000E0 |
| Q13155 | Aminoacyl tRNA synthase complex-interacting multifunctional protein 2 OS=Homo sapiens GN=AIMP2 PE=1 SV=2 - [AIMP2_HUMAN]                           | 35.3  | 2.360E7 | 3.879E7 | 2.116E7 | 0.000E0 | 0.000E0 | 0.000E0 |
| Q96DB5 | Regulator of microtubule dynamics protein 1 OS=Homo sapiens GN=RMDN1 PE=1 SV=1 - [RMD1_HUMAN]                                                      | 35.8  | 1.437E7 | 8.343E6 | 1.738E7 | 0.000E0 | 0.000E0 | 0.000E0 |
| Q13501 | Sequestosome-1 OS=Homo sapiens GN=SQSTM1 PE=1 SV=1 - [SQSTM1_HUMAN]                                                                                | 47.7  | 3.431E6 | 5.524E6 | 2.944E6 | 0.000E0 | 0.000E0 | 0.000E0 |
| Q9H6E4 | Coiled-coil domain-containing protein 134 OS=Homo sapiens GN=CCDC134 PE=1 SV=1 - [CC134_HUMAN]                                                     | 26.5  | 6.918E6 | 1.425E7 | 1.055E7 | 0.000E0 | 0.000E0 | 0.000E0 |
| Q12873 | Chromodomain-helicase-DNA-binding protein 3 OS=Homo sapiens GN=CHD3 PE=1 SV=3 - [CHD3_HUMAN]                                                       | 226.4 | 4.673E7 | 3.934E7 | 2.221E7 | 0.000E0 | 0.000E0 | 0.000E0 |
| O60684 | Importin subunit alpha-7 OS=Homo sapiens GN=KPNA6 PE=1 SV=1 - [IMA7_HUMAN]                                                                         | 60.0  | 2.000E7 | 2.723E7 | 1.317E7 | 0.000E0 | 0.000E0 | 0.000E0 |
| Q722W9 | 39S ribosomal protein L21, mitochondrial OS=Homo sapiens GN=MRPL21 PE=1 SV=2 - [RM21_HUMAN]                                                        | 22.8  | 3.032E7 | 2.805E7 | 1.452E7 | 0.000E0 | 0.000E0 | 0.000E0 |
| Q727K6 | Centromere protein V OS=Homo sapiens GN=CENPV PE=1 SV=1 - [CENPV_HUMAN]                                                                            | 29.9  | 7.322E7 | 4.451E7 | 9.396E7 | 0.000E0 | 0.000E0 | 0.000E0 |
| Q9Y5Q8 | General transcription factor 3C polypeptide 5 OS=Homo sapiens GN=GTF3C5 PE=1 SV=2 - [TF3C5_HUMAN]                                                  | 59.5  | 9.480E6 | 9.901E6 | 4.792E6 | 0.000E0 | 0.000E0 | 0.000E0 |
| Q8WVC6 | Dephospho-CoA kinase domain-containing protein OS=Homo sapiens GN=DCAKD PE=1 SV=1 - [DCAKD_HUMAN]                                                  | 26.5  | 2.844E7 | 1.678E7 | 1.550E7 | 0.000E0 | 0.000E0 | 0.000E0 |
| Q9GZM5 | Protein YIPF3 OS=Homo sapiens GN=YIPF3 PE=1 SV=1 - [YIPF3_HUMAN]                                                                                   | 38.2  | 3.175E7 | 2.462E7 | 1.503E7 | 0.000E0 | 0.000E0 | 0.000E0 |
| O43681 | ATPase ASNA1 OS=Homo sapiens GN=ASNA1 PE=1 SV=2 - [ASNA_HUMAN]                                                                                     | 38.8  | 4.681E7 | 4.672E7 | 2.302E7 | 0.000E0 | 0.000E0 | 0.000E0 |
| Q99720 | Sigma non-opioid intracellular receptor 1 OS=Homo sapiens GN=SIGMAR1 PE=1 SV=1 - [SGMR1_HUMAN]                                                     | 25.1  | 4.328E7 | 3.577E7 | 2.033E7 | 0.000E0 | 0.000E0 | 0.000E0 |
| Q15904 | V-type proton ATPase subunit S1 OS=Homo sapiens GN=ATP6AP1 PE=1 SV=2 - [VAS1_HUMAN]                                                                | 52.0  | 2.012E7 | 1.709E7 | 9.341E6 | 0.000E0 | 0.000E0 | 0.000E0 |
| Q9UPT9 | Ubiquitin carboxyl-terminal hydrolase 22 OS=Homo sapiens GN=USP22 PE=1 SV=2 - [UBP22_HUMAN]                                                        | 59.9  | 1.381E7 | 1.937E7 | 9.189E6 | 0.000E0 | 0.000E0 | 0.000E0 |
| Q96SU4 | Oxysterol-binding protein-related protein 9 OS=Homo sapiens GN=OSBPL9 PE=1 SV=2 - [OSBL9_HUMAN]                                                    | 83.1  | 3.755E6 | 7.221E6 | 4.364E6 | 0.000E0 | 0.000E0 | 0.000E0 |
| Q9BV20 | Methylthioribose-1-phosphate isomerase OS=Homo sapiens GN=MR1 PE=1 SV=1 - [MTNA_HUMAN]                                                             | 39.1  | 6.226E6 | 1.199E7 | 7.237E6 | 0.000E0 | 0.000E0 | 0.000E0 |
| P51572 | B-cell receptor-associated protein 31 OS=Homo sapiens GN=BCAP31 PE=1 SV=3 - [BAP31_HUMAN]                                                          | 28.0  | 1.590E8 | 7.751E7 | 1.053E8 | 0.000E0 | 0.000E0 | 0.000E0 |

|        |                                                                                                                          |       |         |         |         |         |         |         |
|--------|--------------------------------------------------------------------------------------------------------------------------|-------|---------|---------|---------|---------|---------|---------|
| Q9P2W9 | Syntaxin-18 OS=Homo sapiens GN=STX18 PE=1 SV=1 - [STX18_HUMAN]                                                           | 38.6  | 1.341E7 | 1.452E7 | 6.745E6 | 0.000E0 | 0.000E0 | 0.000E0 |
| P33947 | ER lumen protein-retaining receptor 2 OS=Homo sapiens GN=KDELRL2 PE=1 SV=1 - [ERD22_HUMAN]                               | 24.4  | 8.000E6 | 6.087E6 | 3.683E6 | 0.000E0 | 0.000E0 | 0.000E0 |
| Q96JB5 | CDK5 regulatory subunit-associated protein 3 OS=Homo sapiens GN=CDK5RAP3 PE=1 SV=2 - [CK5P3_HUMAN]                       | 56.9  | 1.627E7 | 1.224E7 | 7.509E6 | 0.000E0 | 0.000E0 | 0.000E0 |
| Q9P003 | Protein cornichon homolog 4 OS=Homo sapiens GN=CNH4 PE=1 SV=1 - [CNH4_HUMAN]                                             | 16.1  | 7.847E7 | 5.607E7 | 3.660E7 | 0.000E0 | 0.000E0 | 0.000E0 |
| Q13576 | Ras GTPase-activating-like protein IQGAP2 OS=Homo sapiens GN=IQGAP2 PE=1 SV=4 - [IQGA2_HUMAN]                            | 180.5 | 1.120E7 | 6.929E6 | 5.642E6 | 0.000E0 | 0.000E0 | 0.000E0 |
| Q9H330 | Transmembrane protein 245 OS=Homo sapiens OX=9606 GN=TMEM245 PE=1 SV=3 - [TM245_HUMAN]                                   | 97.3  | 9.392E6 | 6.704E6 | 4.378E6 | 0.000E0 | 0.000E0 | 0.000E0 |
| Q5VW32 | BRO1 domain-containing protein BROX OS=Homo sapiens GN=BROX PE=1 SV=1 - [BROX_HUMAN]                                     | 46.4  | 7.605E6 | 1.562E7 | 1.017E7 | 0.000E0 | 0.000E0 | 0.000E0 |
| O15126 | Secretory carrier-associated membrane protein 1 OS=Homo sapiens GN=SCAMP1 PE=1 SV=2 - [SCAM1_HUMAN]                      | 37.9  | 1.393E7 | 1.098E7 | 6.325E6 | 0.000E0 | 0.000E0 | 0.000E0 |
| P14209 | CD99 antigen OS=Homo sapiens GN=CD99 PE=1 SV=1 - [CD99_HUMAN]                                                            | 18.8  | 3.767E7 | 2.319E7 | 1.897E7 | 0.000E0 | 0.000E0 | 0.000E0 |
| Q8IUR0 | Trafficking protein particle complex subunit 5 OS=Homo sapiens GN=TRAPPC5 PE=1 SV=1 - [TPPC5_HUMAN]                      | 20.8  | 3.839E6 | 8.141E6 | 8.088E6 | 0.000E0 | 0.000E0 | 0.000E0 |
| Q8IUR7 | Armado repeat-containing protein 8 OS=Homo sapiens GN=ARMC8 PE=1 SV=2 - [ARMC8_HUMAN]                                    | 75.5  | 4.483E6 | 7.581E6 | 3.909E6 | 0.000E0 | 0.000E0 | 0.000E0 |
| Q07960 | Rho GTPase-activating protein 1 OS=Homo sapiens GN=ARHGAP1 PE=1 SV=1 - [RHG01_HUMAN]                                     | 50.4  | 1.467E7 | 3.080E7 | 2.034E7 | 0.000E0 | 0.000E0 | 0.000E0 |
| Q13636 | Ras-related protein Rab-31 OS=Homo sapiens GN=RAB31 PE=1 SV=1 - [RAB31_HUMAN]                                            | 21.6  | 3.411E7 | 3.007E7 | 1.523E7 | 0.000E0 | 0.000E0 | 0.000E0 |
| Q96IZ0 | PRKC apoptosis WT1 regulator protein OS=Homo sapiens GN=PAWR PE=1 SV=1 - [PAWR_HUMAN]                                    | 36.5  | 3.536E6 | 7.286E6 | 7.897E6 | 0.000E0 | 0.000E0 | 0.000E0 |
| Q96IJ6 | Mannose-1-phosphate guanylyltransferase alpha OS=Homo sapiens GN=GMPPA PE=1 SV=1 - [GMPPA_HUMAN]                         | 46.3  | 3.882E6 | 7.887E6 | 4.817E6 | 0.000E0 | 0.000E0 | 0.000E0 |
| P52735 | Guanine nucleotide exchange factor VAV2 OS=Homo sapiens GN=VAV2 PE=1 SV=2 - [VAV2_HUMAN]                                 | 101.2 | 6.244E6 | 1.112E7 | 5.828E6 | 0.000E0 | 0.000E0 | 0.000E0 |
| Q9NZN8 | CCR4-NOT transcription complex subunit 2 OS=Homo sapiens GN=CNOT2 PE=1 SV=1 - [CNOT2_HUMAN]                              | 59.7  | 9.082E6 | 1.696E7 | 9.273E6 | 0.000E0 | 0.000E0 | 0.000E0 |
| O14949 | Cytochrome b-c1 complex subunit 8 OS=Homo sapiens GN=UQCRCQ PE=1 SV=4 - [QCR8_HUMAN]                                     | 9.9   | 5.670E7 | 4.793E7 | 2.472E7 | 0.000E0 | 0.000E0 | 0.000E0 |
| Q969Z0 | Protein TBGR4 OS=Homo sapiens GN=TBGR4 PE=1 SV=1 - [TBGR4_HUMAN]                                                         | 70.7  | 2.352E7 | 2.216E7 | 1.042E7 | 0.000E0 | 0.000E0 | 0.000E0 |
| Q8NFO8 | Torsin-1A-interacting protein 2 OS=Homo sapiens GN=TOR1AIP2 PE=1 SV=1 - [TOIP2_HUMAN]                                    | 51.2  | 1.094E7 | 7.294E6 | 5.013E6 | 0.000E0 | 0.000E0 | 0.000E0 |
| Q8IWB7 | WD repeat and FYVE domain-containing protein 1 OS=Homo sapiens GN=WDFY1 PE=1 SV=1 - [WDFY1_HUMAN]                        | 46.3  | 1.426E7 | 3.315E7 | 2.471E7 | 0.000E0 | 0.000E0 | 0.000E0 |
| Q9P2Q2 | FERM domain-containing protein 4A OS=Homo sapiens GN=FRMD4A PE=1 SV=3 - [FRM4A_HUMAN]                                    | 115.4 | 5.964E7 | 4.368E7 | 2.569E7 | 0.000E0 | 0.000E0 | 0.000E0 |
| Q9BQE5 | Apolipoprotein L2 OS=Homo sapiens GN=APOL2 PE=1 SV=1 - [APOL2_HUMAN]                                                     | 37.1  | 1.476E7 | 7.758E6 | 7.847E6 | 0.000E0 | 0.000E0 | 0.000E0 |
| Q6UX04 | Peptidyl-prolyl cis-trans isomerase CWC27 homolog OS=Homo sapiens GN=CWC27 PE=1 SV=1 - [CWC27_HUMAN]                     | 53.8  | 1.232E7 | 2.134E7 | 1.033E7 | 0.000E0 | 0.000E0 | 0.000E0 |
| P23258 | Tubulin gamma-1 chain OS=Homo sapiens GN=TUBG1 PE=1 SV=2 - [TUBG1_HUMAN]                                                 | 51.1  | 3.674E7 | 4.739E7 | 3.045E7 | 2.224E6 | 0.000E0 | 0.000E0 |
| O95573 | Long-chain-fatty-acid-CoA ligase 3 OS=Homo sapiens GN=ACSL3 PE=1 SV=3 - [ACSL3_HUMAN]                                    | 80.4  | 9.981E7 | 7.584E7 | 4.479E7 | 0.000E0 | 5.937E6 | 0.000E0 |
| Q9Y6B6 | GTP-binding protein SAR1b OS=Homo sapiens GN=SAR1B PE=1 SV=1 - [SAR1B_HUMAN]                                             | 22.4  | 7.272E7 | 8.833E7 | 6.954E7 | 0.000E0 | 6.255E6 | 0.000E0 |
| Q13740 | CD166 antigen OS=Homo sapiens GN=ALCAM PE=1 SV=2 - [CD166_HUMAN]                                                         | 65.1  | 1.789E8 | 2.869E8 | 2.206E8 | 0.000E0 | 1.186E7 | 9.509E6 |
| Q9H6V9 | UPF0554 protein C2orf43 OS=Homo sapiens GN=C2orf43 PE=1 SV=1 - [CB043_HUMAN]                                             | 37.3  | 3.835E7 | 2.817E7 | 1.649E7 | 0.000E0 | 0.000E0 | 2.639E6 |
| P62487 | DNA-directed RNA polymerase II subunit RPB7 OS=Homo sapiens GN=POLR2G PE=1 SV=1 - [RPB7_HUMAN]                           | 19.3  | 1.506E7 | 1.147E7 | 1.801E7 | 0.000E0 | 1.438E6 | 0.000E0 |
| Q9H845 | Acyl-CoA dehydrogenase family member 9, mitochondrial OS=Homo sapiens GN=ACAD9 PE=1 SV=1 - [ACAD9_HUMAN]                 | 68.7  | 4.400E7 | 4.434E7 | 2.016E7 | 0.000E0 | 3.606E6 | 0.000E0 |
| O95772 | MLN64 N-terminal domain homolog OS=Homo sapiens GN=STARD3NL PE=1 SV=1 - [MENTO_HUMAN]                                    | 26.6  | 1.301E7 | 1.383E7 | 6.410E6 | 0.000E0 | 1.145E6 | 0.000E0 |
| Q14978 | Nucleolar and coiled-body phosphoprotein 1 OS=Homo sapiens GN=NOLC1 PE=1 SV=2 - [NOLC1_HUMAN]                            | 73.6  | 1.746E7 | 1.912E7 | 9.610E6 | 0.000E0 | 1.653E6 | 0.000E0 |
| O95232 | Luc7-like protein 3 OS=Homo sapiens GN=LUC7L3 PE=1 SV=2 - [LC7L3_HUMAN]                                                  | 51.4  | 1.594E7 | 1.668E7 | 1.425E7 | 0.000E0 | 0.000E0 | 1.717E6 |
| Q9NR31 | GTP-binding protein SAR1a OS=Homo sapiens GN=SAR1A PE=1 SV=1 - [SAR1A_HUMAN]                                             | 22.4  | 1.244E8 | 1.567E8 | 1.085E8 | 0.000E0 | 6.255E6 | 9.457E6 |
| O43615 | Mitochondrial import inner membrane translocase subunit TIM44 OS=Homo sapiens GN=TIMM44 PE=1 SV=2 - [TIM44_HUMAN]        | 51.3  | 6.820E7 | 6.990E7 | 3.756E7 | 5.341E6 | 0.000E0 | 2.138E6 |
| O95741 | Copine-6 OS=Homo sapiens GN=CPNE6 PE=1 SV=3 - [CPNE6_HUMAN]                                                              | 62.0  | 8.904E7 | 6.417E7 | 4.995E7 | 0.000E0 | 8.686E6 | 0.000E0 |
| Q9NVJ2 | ADP-ribosylation factor-like protein 8B OS=Homo sapiens GN=ARL8B PE=1 SV=1 - [ARL8B_HUMAN]                               | 21.5  | 7.541E7 | 7.022E7 | 4.705E7 | 0.000E0 | 8.570E6 | 0.000E0 |
| Q9BXW7 | Cat eye syndrome critical region protein 5 OS=Homo sapiens GN=CECR5 PE=1 SV=1 - [CECR5_HUMAN]                            | 46.3  | 8.660E7 | 1.807E8 | 1.293E8 | 0.000E0 | 9.969E6 | 7.699E6 |
| O43837 | Isocitrate dehydrogenase [NAD] subunit beta, mitochondrial OS=Homo sapiens GN=IDH3B PE=1 SV=2 - [IDH3B_HUMAN]            | 42.2  | 1.497E7 | 1.149E7 | 1.467E7 | 0.000E0 | 0.000E0 | 1.885E6 |
| O75131 | Copine-3 OS=Homo sapiens GN=CPNE3 PE=1 SV=1 - [CPNE3_HUMAN]                                                              | 60.1  | 7.339E7 | 5.526E7 | 3.505E7 | 0.000E0 | 7.530E6 | 0.000E0 |
| Q9BSK4 | Protein fem-1 homolog A OS=Homo sapiens GN=FEM1A PE=1 SV=1 - [FEM1A_HUMAN]                                               | 73.6  | 2.998E8 | 2.733E8 | 2.224E8 | 4.032E7 | 0.000E0 | 0.000E0 |
| Q8WXI9 | Transcriptional repressor p66-beta OS=Homo sapiens GN=GATAD2B PE=1 SV=1 - [P66B_HUMAN]                                   | 65.2  | 8.417E6 | 7.689E6 | 5.580E6 | 0.000E0 | 1.148E6 | 0.000E0 |
| G2XKQ0 | Small ubiquitin-related modifier 5 OS=Homo sapiens OX=9606 GN=SUMO1P1 PE=1 SV=2 - [SUMO5_HUMAN]                          | 11.5  | 2.316E7 | 3.211E7 | 2.814E7 | 4.456E6 | 0.000E0 | 0.000E0 |
| P50402 | Emerin OS=Homo sapiens GN=EMD PE=1 SV=1 - [EMD_HUMAN]                                                                    | 29.0  | 1.949E7 | 1.614E7 | 1.177E7 | 0.000E0 | 2.552E6 | 0.000E0 |
| P51151 | Ras-related protein Rab-9A OS=Homo sapiens GN=RAB9A PE=1 SV=1 - [RAB9A_HUMAN]                                            | 22.8  | 1.829E7 | 1.034E7 | 1.791E7 | 0.000E0 | 0.000E0 | 2.666E6 |
| Q9Y295 | Developmentally-regulated GTP-binding protein 1 OS=Homo sapiens GN=DRG1 PE=1 SV=1 - [DRG1_HUMAN]                         | 40.5  | 9.577E6 | 1.009E7 | 1.321E7 | 0.000E0 | 0.000E0 | 1.917E6 |
| Q9Y224 | Tyrosine-tRNA ligase, mitochondrial OS=Homo sapiens GN=YARS2 PE=1 SV=2 - [SYYM_HUMAN]                                    | 53.2  | 2.680E7 | 2.347E7 | 1.258E7 | 0.000E0 | 3.707E6 | 0.000E0 |
| Q9Y4W6 | AFG3-like protein 2 OS=Homo sapiens GN=AFG3L2 PE=1 SV=2 - [AFG32_HUMAN]                                                  | 88.5  | 3.528E7 | 4.997E7 | 4.782E7 | 0.000E0 | 5.625E6 | 2.502E6 |
| Q99805 | Transmembrane 9 superfamily member 2 OS=Homo sapiens GN=TM9SF2 PE=1 SV=1 - [TM9S2_HUMAN]                                 | 75.7  | 1.055E8 | 7.465E7 | 4.764E7 | 6.010E6 | 7.958E6 | 0.000E0 |
| Q96HR9 | Receptor expression-enhancing protein 6 OS=Homo sapiens GN=REEP6 PE=1 SV=2 - [REEP6_HUMAN]                               | 23.4  | 1.889E7 | 2.117E7 | 1.212E7 | 0.000E0 | 0.000E0 | 3.239E6 |
| Q14498 | RNA-binding protein 39 OS=Homo sapiens GN=RBM39 PE=1 SV=2 - [RBM39_HUMAN]                                                | 59.3  | 4.670E7 | 4.194E7 | 2.682E7 | 0.000E0 | 1.955E6 | 5.427E6 |
| Q8TAQ2 | SWI/SNF complex subunit SMARCC2 OS=Homo sapiens GN=SMARCC2 PE=1 SV=1 - [SMRC2_HUMAN]                                     | 132.8 | 3.867E8 | 3.784E8 | 2.122E8 | 2.672E7 | 1.735E7 | 1.879E7 |
| Q13418 | Integrin-linked protein kinase OS=Homo sapiens GN=ILK PE=1 SV=2 - [ILK_HUMAN]                                            | 51.4  | 1.594E7 | 2.887E7 | 1.737E7 | 0.000E0 | 0.000E0 | 4.044E6 |
| P49748 | Very long-chain specific acyl-CoA dehydrogenase, mitochondrial OS=Homo sapiens GN=ACADVL PE=1 SV=1 - [ACADV_HUMAN]       | 70.3  | 6.980E7 | 5.224E7 | 6.205E7 | 0.000E0 | 1.218E7 | 0.000E0 |
| O43847 | Nardilysin OS=Homo sapiens OX=9606 GN=NRDC PE=1 SV=3 - [NRDC_HUMAN]                                                      | 131.6 | 3.340E7 | 5.662E7 | 4.163E7 | 0.000E0 | 3.088E6 | 5.650E6 |
| P55084 | Trifunctional enzyme subunit beta, mitochondrial OS=Homo sapiens GN=HADHB PE=1 SV=3 - [ECHB_HUMAN]                       | 51.3  | 1.800E8 | 1.743E8 | 1.297E8 | 5.496E6 | 1.188E7 | 1.477E7 |
| P56556 | NADH dehydrogenase [ubiquinone] 1 alpha subcomplex subunit 6 OS=Homo sapiens OX=9606 GN=NDUFA6 PE=1 SV=4 - [NDUA6_HUMAN] | 15.1  | 5.333E7 | 3.310E7 | 2.522E7 | 0.000E0 | 7.446E6 | 0.000E0 |
| Q14160 | Protein scribble homolog OS=Homo sapiens GN=SCRIB PE=1 SV=4 - [SCRIB_HUMAN]                                              | 174.8 | 4.339E7 | 3.206E7 | 4.012E7 | 1.334E6 | 4.219E6 | 2.229E6 |
| Q5UJ48 | Protein crumbs homolog 2 OS=Homo sapiens GN=CRB2 PE=1 SV=2 - [CRUM2_HUMAN]                                               | 134.2 | 9.609E7 | 5.222E7 | 5.716E7 | 0.000E0 | 4.175E6 | 9.666E6 |
| O94874 | E3 UFM1-protein ligase 1 OS=Homo sapiens GN=UFL1 PE=1 SV=2 - [UFL1_HUMAN]                                                | 89.5  | 2.405E7 | 1.628E7 | 1.207E7 | 0.000E0 | 3.568E6 | 0.000E0 |
| Q9C0C4 | Semaphorin-4C OS=Homo sapiens GN=SEMA4C PE=1 SV=2 - [SEM4C_HUMAN]                                                        | 92.6  | 9.544E6 | 8.970E6 | 1.038E7 | 0.000E0 | 2.074E6 | 0.000E0 |
| Q5XLA6 | Caspase recruitment domain-containing protein 17 OS=Homo sapiens GN=CARD17 PE=1 SV=1 - [CAR17_HUMAN]                     | 11.9  | 5.226E7 | 7.028E7 | 6.306E7 | 1.335E7 | 0.000E0 | 0.000E0 |
| Q15738 | Sterol-4-alpha-carboxylate 3-dehydrogenase, decarboxylating OS=Homo sapiens GN=NSDHL PE=1 SV=2 - [NSDHL_HUMAN]           | 41.9  | 1.443E8 | 1.144E8 | 1.020E8 | 4.168E6 | 1.266E7 | 9.341E6 |
| Q92506 | Estradiol 17-beta-dehydrogenase 8 OS=Homo sapiens GN=HSD17B8 PE=1 SV=2 - [DHB8_HUMAN]                                    | 27.0  | 2.194E6 | 1.827E6 | 1.676E6 | 0.000E0 | 4.184E5 | 0.000E0 |
| Q93008 | Probable ubiquitin carboxyl-terminal hydrolase FAF-X OS=Homo sapiens GN=USP9X PE=1 SV=3 - [USP9X_HUMAN]                  | 292.1 | 1.918E7 | 2.985E7 | 3.867E7 | 0.000E0 | 3.675E6 | 2.824E6 |
| Q9BYV8 | Centrosomal protein of 41 kDa OS=Homo sapiens GN=CEP41 PE=1 SV=1 - [CEP41_HUMAN]                                         | 41.3  | 2.712E6 | 6.305E6 | 4.985E6 | 0.000E0 | 1.040E6 | 0.000E0 |
| O75396 | Vesicle-trafficking protein SEC22b OS=Homo sapiens GN=SEC22B PE=1 SV=4 - [SC22B_HUMAN]                                   | 24.6  | 8.749E7 | 8.154E7 | 5.632E7 | 0.000E0 | 8.033E6 | 1.008E7 |
| P63096 | Guanine nucleotide-binding protein G(i) subunit alpha-1 OS=Homo sapiens GN=GNAI1 PE=1 SV=2 - [GNAI1_HUMAN]               | 40.3  | 2.595E8 | 2.519E8 | 1.467E8 | 1.560E7 | 3.354E7 | 4.365E6 |
| Q12907 | Vesicular integral-membrane protein VIP36 OS=Homo sapiens GN=LMAN2 PE=1 SV=1 - [LMAN2_HUMAN]                             | 40.2  | 1.396E8 | 1.011E8 | 6.120E7 | 1.821E6 | 2.300E7 | 0.000E0 |
| Q5SQI0 | Alpha-tubulin N-acetyltransferase 1 OS=Homo sapiens GN=ATAT1 PE=1 SV=1 - [ATAT_HUMAN]                                    | 46.8  | 6.481E6 | 9.230E6 | 5.531E6 | 0.000E0 | 0.000E0 | 1.771E6 |
| P20042 | Eukaryotic translation initiation factor 2 subunit 2 OS=Homo sapiens GN=EIF2S2 PE=1 SV=2 - [IF2B_HUMAN]                  | 38.4  | 1.591E7 | 2.664E7 | 2.534E7 | 0.000E0 | 0.000E0 | 5.666E6 |
| P12931 | Proto-oncogene tyrosine-protein kinase Src OS=Homo sapiens GN=SRC PE=1 SV=3 - [SRC_HUMAN]                                | 59.8  | 5.176E7 | 1.020E8 | 5.989E7 | 0.000E0 | 0.000E0 | 1.804E7 |
| Q8WYA6 | Beta-catenin-like protein 1 OS=Homo sapiens GN=CTNBL1 PE=1 SV=1 - [CTBL1_HUMAN]                                          | 65.1  | 4.568E7 | 3.865E7 | 3.100E7 | 3.391E6 | 0.000E0 | 6.385E6 |
| P78344 | Eukaryotic translation initiation factor 4 gamma 2 OS=Homo sapiens GN=EIF4G2 PE=1 SV=1 - [IF4G2_HUMAN]                   | 102.3 | 4.948E7 | 4.685E7 | 2.744E7 | 1.023E6 | 3.595E6 | 5.890E6 |
| P08754 | Guanine nucleotide-binding protein G(k) subunit alpha OS=Homo sapiens GN=GNAI3 PE=1 SV=3 - [GNAI3_HUMAN]                 | 40.5  | 2.595E8 | 2.519E8 | 1.467E8 | 1.660E7 | 3.354E7 | 6.050E6 |
| Q14318 | Peptidyl-prolyl cis-trans isomerase FKBP8 OS=Homo sapiens GN=FKBP8 PE=1 SV=2 - [FKBP8_HUMAN]                             | 44.5  | 6.618E7 | 5.612E7 | 3.864E7 | 0.000E0 | 4.751E6 | 9.108E6 |
| Q96BM9 | ADP-ribosylation factor-like protein 8A OS=Homo sapiens GN=ARL8A PE=1 SV=1 - [ARL8A_HUMAN]                               | 21.4  | 7.541E7 | 7.022E7 | 4.705E7 | 0.000E0 | 6.666E6 | 9.961E6 |
| P11172 | Uridine 5'-monophosphate synthase OS=Homo sapiens GN=UMPS PE=1 SV=1 - [UMPS_HUMAN]                                       | 52.2  | 5.033E7 | 3.943E7 | 5.500E7 | 3.490E6 | 3.689E6 | 5.479E6 |
| P09234 | U1 small nuclear ribonucleoprotein C OS=Homo sapiens GN=SNRPC PE=1 SV=1 - [RU1C_HUMAN]                                   | 17.4  | 2.627E7 | 3.152E7 | 2.054E7 | 0.000E0 | 0.000E0 | 6.948E6 |
| P08621 | U1 small nuclear ribonucleoprotein 70 kDa OS=Homo sapiens GN=SNRNP70 PE=1 SV=2 - [RU17_HUMAN]                            | 51.5  | 5.743E7 | 5.739E7 | 2.680E7 | 0.000E0 | 1.259E7 | 0.000E0 |

|        |                                                                                                                   |       |         |         |         |         |         |         |
|--------|-------------------------------------------------------------------------------------------------------------------|-------|---------|---------|---------|---------|---------|---------|
| O75521 | Enoyl-CoA delta isomerase 2, mitochondrial OS=Homo sapiens GN=ECI2 PE=1 SV=4 - [ECI2_HUMAN]                       | 43.6  | 3.097E7 | 2.677E7 | 2.160E7 | 0.000E0 | 0.000E0 | 7.113E6 |
| Q969T4 | Ubiquitin-conjugating enzyme E2 E3 OS=Homo sapiens GN=UBE2E3 PE=1 SV=1 - [UB2E3_HUMAN]                            | 22.9  | 1.847E7 | 2.422E7 | 1.010E7 | 0.000E0 | 0.000E0 | 4.741E6 |
| Q13616 | Cullin-1 OS=Homo sapiens GN=CUL1 PE=1 SV=2 - [CUL1_HUMAN]                                                         | 89.6  | 1.409E7 | 1.599E7 | 9.580E6 | 3.589E6 | 0.000E0 | 0.000E0 |
| P48509 | CD151 antigen OS=Homo sapiens GN=CD151 PE=1 SV=3 - [CD151_HUMAN]                                                  | 28.3  | 1.899E7 | 1.302E7 | 1.315E7 | 0.000E0 | 4.096E6 | 0.000E0 |
| Q92841 | Probable ATP-dependent RNA helicase DDX17 OS=Homo sapiens GN=DDX17 PE=1 SV=2 - [DDX17_HUMAN]                      | 80.2  | 2.440E8 | 2.071E8 | 1.621E8 | 5.697E6 | 2.078E7 | 2.931E7 |
| P52294 | Importin subunit alpha-5 OS=Homo sapiens GN=KPNA1 PE=1 SV=3 - [IMA5_HUMAN]                                        | 60.2  | 1.895E7 | 2.078E7 | 9.196E6 | 0.000E0 | 2.678E6 | 1.841E6 |
| Q15555 | Microtubule-associated protein RP/EB family member 2 OS=Homo sapiens GN=MAPRE2 PE=1 SV=1 - [MARE2_HUMAN]          | 37.0  | 1.457E7 | 1.739E7 | 1.844E7 | 0.000E0 | 4.698E6 | 0.000E0 |
| Q9NXR7 | BRCA1-A complex subunit BRE OS=Homo sapiens GN=BRE PE=1 SV=2 - [BRE_HUMAN]                                        | 43.5  | 4.048E6 | 7.273E6 | 3.874E6 | 0.000E0 | 1.420E6 | 0.000E0 |
| Q96HY6 | DDRKG domain-containing protein 1 OS=Homo sapiens GN=DDRKG1 PE=1 SV=2 - [DDRKG_HUMAN]                             | 35.6  | 2.760E7 | 1.821E7 | 1.320E7 | 0.000E0 | 3.024E6 | 2.520E6 |
| P11233 | Ras-related protein Ral-A OS=Homo sapiens GN=RALA PE=1 SV=1 - [RALA_HUMAN]                                        | 23.6  | 6.126E7 | 5.169E7 | 3.178E7 | 0.000E0 | 1.366E7 | 0.000E0 |
| Q13217 | DnaJ homolog subfamily C member 3 OS=Homo sapiens GN=DNAJC3 PE=1 SV=1 - [DNJC3_HUMAN]                             | 57.5  | 2.631E7 | 1.864E7 | 2.789E7 | 0.000E0 | 6.908E6 | 0.000E0 |
| Q9UHN6 | Transmembrane protein 2 OS=Homo sapiens GN=TMEM2 PE=1 SV=1 - [TMEM2_HUMAN]                                        | 154.3 | 1.833E8 | 9.885E7 | 1.938E8 | 0.000E0 | 4.589E7 | 0.000E0 |
| P11234 | Ras-related protein Ral-B OS=Homo sapiens GN=RALB PE=1 SV=1 - [RALB_HUMAN]                                        | 23.4  | 5.009E7 | 4.407E7 | 4.737E7 | 0.000E0 | 1.366E7 | 0.000E0 |
| O15078 | Centrosomal protein of 290 kDa OS=Homo sapiens GN=CEP290 PE=1 SV=2 - [CE290_HUMAN]                                | 290.2 | 4.385E8 | 7.144E8 | 6.230E8 | 1.716E8 | 0.000E0 | 0.000E0 |
| Q15041 | ADP-ribosylation factor-like protein 6-interacting protein 1 OS=Homo sapiens GN=ARL6IP1 PE=1 SV=2 - [AR6P1_HUMAN] | 23.3  | 1.360E8 | 1.411E8 | 1.140E8 | 8.802E6 | 1.930E7 | 9.744E6 |
| Q00765 | Receptor expression-enhancing protein 5 OS=Homo sapiens GN=REEP5 PE=1 SV=3 - [REEP5_HUMAN]                        | 21.5  | 4.426E7 | 3.181E7 | 4.006E7 | 0.000E0 | 6.192E6 | 5.067E6 |
| Q9BUB7 | Transmembrane protein 70, mitochondrial OS=Homo sapiens GN=TMEM70 PE=1 SV=2 - [TMM70_HUMAN]                       | 29.0  | 3.533E7 | 4.424E7 | 4.734E7 | 0.000E0 | 1.236E7 | 0.000E0 |
| P17844 | Probable ATP-dependent RNA helicase DDX5 OS=Homo sapiens GN=DDX5 PE=1 SV=1 - [DDX5_HUMAN]                         | 69.1  | 2.440E8 | 1.702E8 | 1.247E8 | 6.945E6 | 2.002E7 | 2.553E7 |
| Q96AG4 | Leucine-rich repeat-containing protein 59 OS=Homo sapiens GN=LRR59 PE=1 SV=1 - [LRC59_HUMAN]                      | 34.9  | 1.284E8 | 1.291E8 | 7.729E7 | 0.000E0 | 3.268E7 | 0.000E0 |
| O14787 | Transportin-2 OS=Homo sapiens GN=TNPO2 PE=1 SV=3 - [TNPO2_HUMAN]                                                  | 101.3 | 6.241E7 | 7.994E7 | 3.694E7 | 7.311E6 | 1.032E7 | 0.000E0 |
| Q9BYD2 | 39S ribosomal protein L9, mitochondrial OS=Homo sapiens GN=MRPL9 PE=1 SV=2 - [RM09_HUMAN]                         | 30.2  | 1.667E7 | 2.005E7 | 1.756E7 | 0.000E0 | 0.000E0 | 5.347E6 |
| P40616 | ADP-ribosylation factor-like protein 1 OS=Homo sapiens GN=ARL1 PE=1 SV=1 - [ARL1_HUMAN]                           | 20.4  | 2.735E7 | 2.644E7 | 2.600E7 | 0.000E0 | 3.659E6 | 4.203E6 |
| Q14677 | Clathrin interactor 1 OS=Homo sapiens GN=CLINT1 PE=1 SV=1 - [EPN4_HUMAN]                                          | 68.2  | 1.237E7 | 1.834E7 | 1.192E7 | 0.000E0 | 0.000E0 | 4.224E6 |
| P04899 | Guanine nucleotide-binding protein G(i) subunit alpha-2 OS=Homo sapiens GN=GNAI2 PE=1 SV=3 - [GNAI2_HUMAN]        | 40.4  | 2.595E8 | 2.519E8 | 1.467E8 | 1.854E7 | 3.391E7 | 1.317E7 |
