# Supplementary material for: Chromosome 22q11.2 deletion causes PERK-dependent vulnerability in dopaminergic neurons
Source: PubMed Central journal article supplement — eBioMedicine. 2020 Dec 17;63:103138. doi: 10.1016/j.ebiom.2020.103138 (PMC7753137; doi:10.1016/j.ebiom.2020.103138), 2020-12-17
Supplement: mmc4.pdf [file mmc4.pdf]

Supplementary Table 3. 22DS group&gt;Control group

| Accession | Description                                                                                                          | MW [kDa] | Area            |                 |                 |                |                |                |
|-----------|----------------------------------------------------------------------------------------------------------------------|----------|-----------------|-----------------|-----------------|----------------|----------------|----------------|
|           |                                                                                                                      |          | #01<br>Control1 | #02<br>Control2 | #03<br>Control3 | #04<br>22DS1_1 | #05<br>22DS2_1 | #06<br>22DS3_1 |
| Q16798    | NADP-dependent malic enzyme, mitochondrial OS=Homo sapiens GN=ME3 PE=2 SV=2 - [MAON_HUMAN]                           | 67.0     | 0.000E0         | 4.162E6         | 0.000E0         | 3.751E7        | 3.507E7        | 5.581E7        |
| P19174    | 1-phosphatidylinositol 4,5-bisphosphate phosphodiesterase gamma-1 OS=Homo sapiens GN=PLCG1 PE=1 SV=1 - [PLCG1_HUMAN] | 148.4    | 1.091E7         | 3.897E7         | 2.546E7         | 1.581E9        | 1.781E9        | 2.336E9        |
| O76076    | WNT1-inducible-signaling pathway protein 2 OS=Homo sapiens GN=WISP2 PE=1 SV=1 - [WISP2_HUMAN]                        | 26.8     | 0.000E0         | 0.000E0         | 0.000E0         | 6.133E7        | 8.950E7        | 8.469E7        |
| Q6ZR08    | Dynein heavy chain 12, axonemal OS=Homo sapiens GN=DNAH12 PE=2 SV=2 - [DYH12_HUMAN]                                  | 356.7    | 0.000E0         | 0.000E0         | 0.000E0         | 3.241E7        | 3.492E7        | 4.802E7        |
| P02686    | Myelin basic protein OS=Homo sapiens GN=MBP PE=1 SV=3 - [MBP_HUMAN]                                                  | 33.1     | 0.000E0         | 0.000E0         | 0.000E0         | 1.129E7        | 1.806E7        | 1.458E7        |
| Q9UJC5    | SH3 domain-binding glutamic acid-rich-like protein 2 OS=Homo sapiens GN=SH3BGL2 PE=1 SV=2 - [SH3L2_HUMAN]            | 12.3     | 0.000E0         | 0.000E0         | 0.000E0         | 1.032E7        | 1.893E7        | 1.841E7        |
| Q9BQI0    | Allograft inflammatory factor 1-like OS=Homo sapiens GN=AIF1L PE=1 SV=1 - [AIF1L_HUMAN]                              | 17.1     | 0.000E0         | 0.000E0         | 0.000E0         | 3.770E6        | 8.329E6        | 7.844E6        |
| P08572    | Collagen alpha-2(IV) chain OS=Homo sapiens GN=COL4A2 PE=1 SV=4 - [CO4A2_HUMAN]                                       | 167.4    | 0.000E0         | 0.000E0         | 0.000E0         | 1.273E8        | 2.897E8        | 2.660E8        |
