# Supplementary material for: Chromosome 22q11.2 deletion causes PERK-dependent vulnerability in dopaminergic neurons
Source: PubMed Central journal article supplement — eBioMedicine. 2020 Dec 17;63:103138. doi: 10.1016/j.ebiom.2020.103138 (PMC7753137; doi:10.1016/j.ebiom.2020.103138), 2020-12-17
Supplement: mmc6.pdf [file mmc6.pdf]

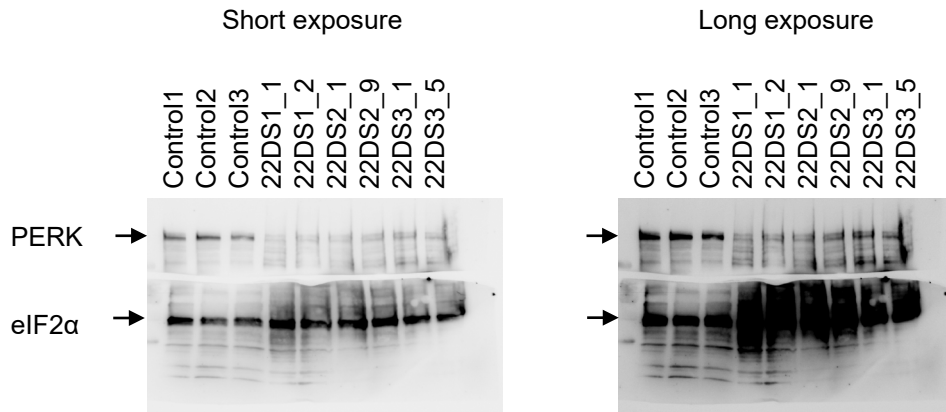

After blotting, the membrane was cut in two. The cut membrane was used for detecting PERK and eIF2 $\alpha$  expression. The left was used for eIF2 $\alpha$  and the right was used for PERK.

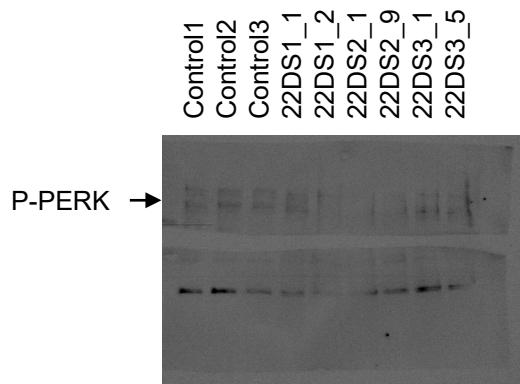

After blotting, the membrane was cut in two. The upper cut membrane was used for detecting P-PERK.

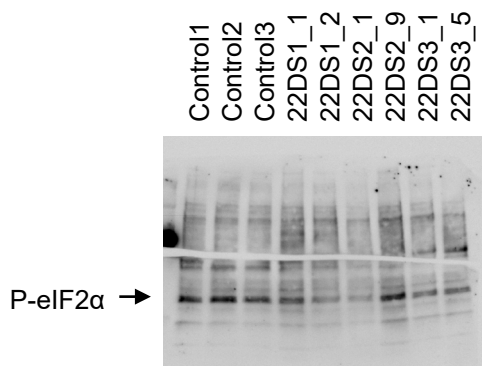

After blotting, the membrane was cut in two. The lower cut membrane was used for detecting P-eIF2 $\alpha$ .

## Full blots for Figure 2a

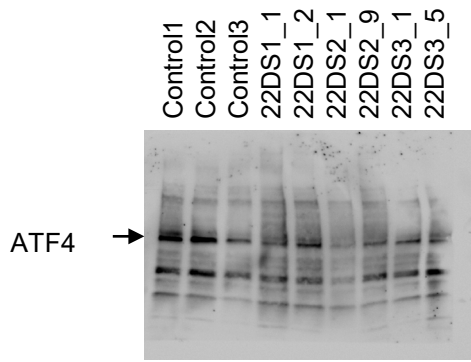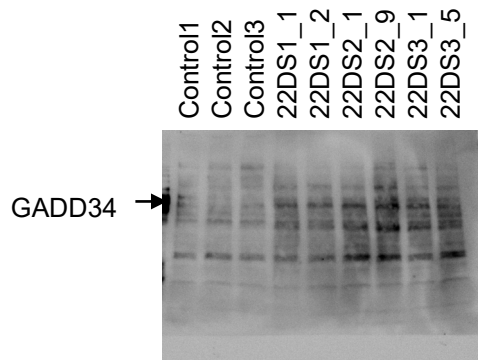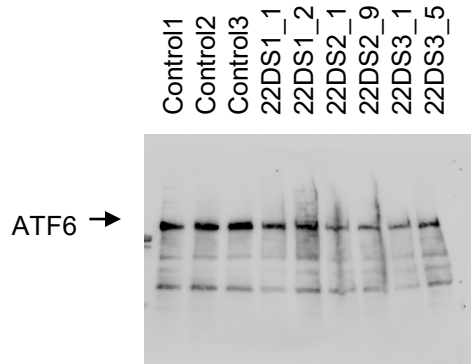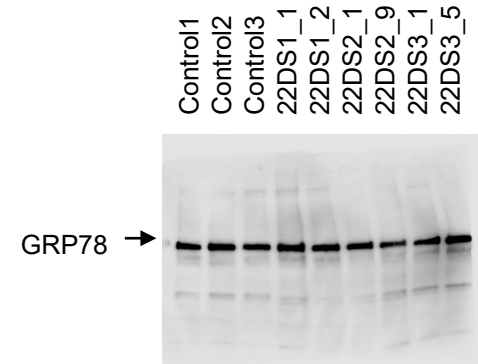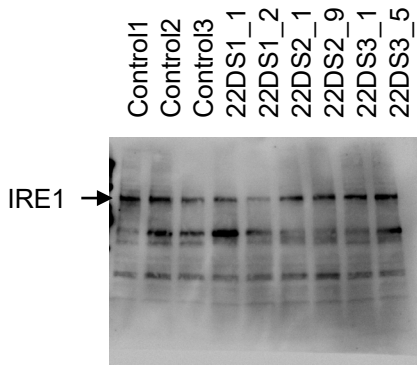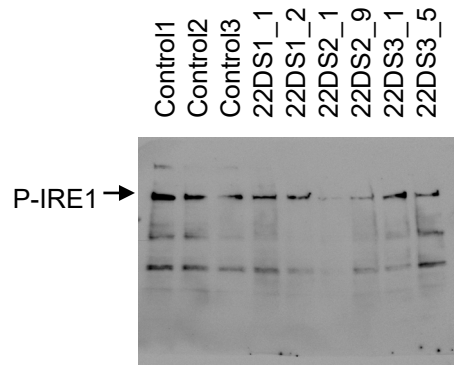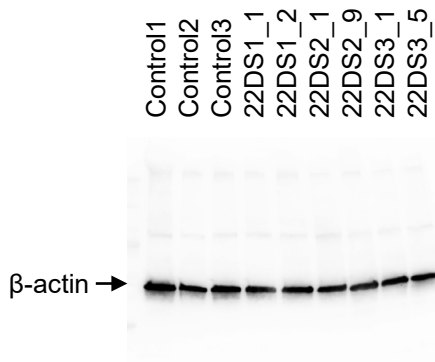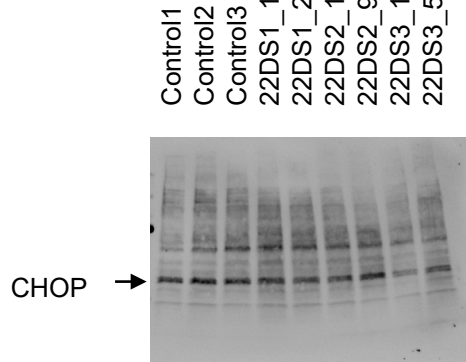

**(continued) Full blots for Figure 2a**

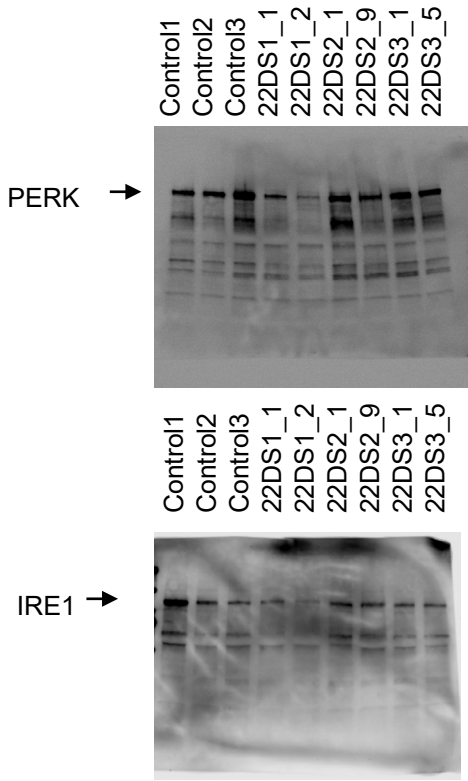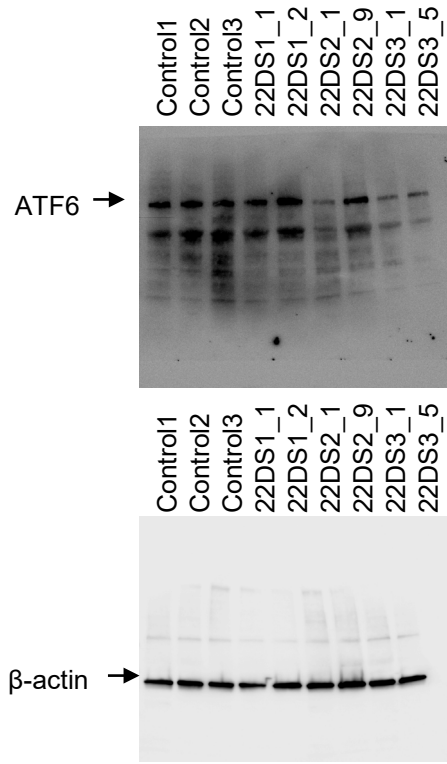

### Full blots for Figure 3i

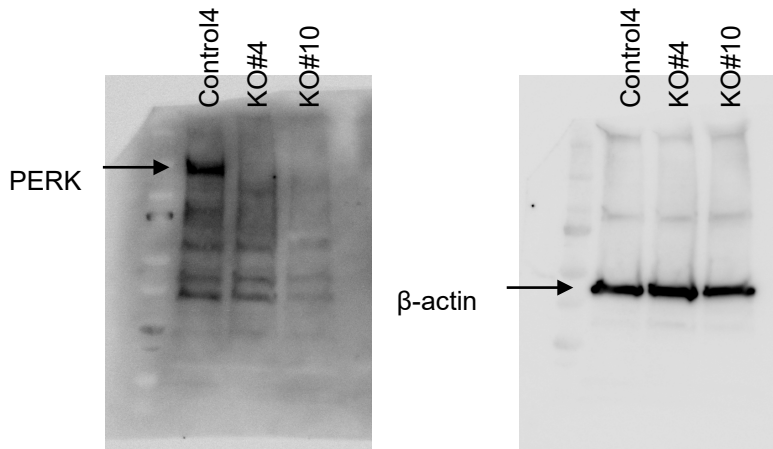

### Full blots for Figure 4g

The right membrane was the same as the left.

Puromycin

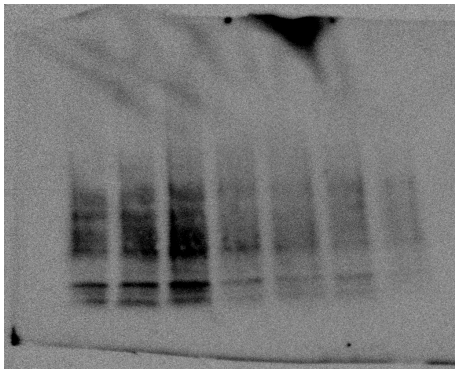

β-actin →

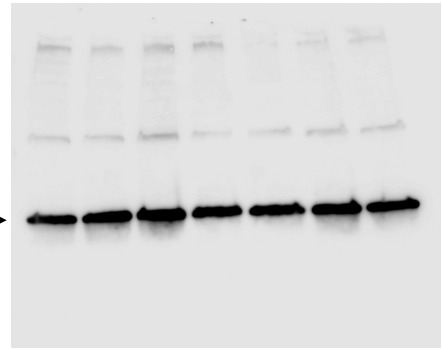

### Full blots for Figure 6a

The right membrane was the same as the left.

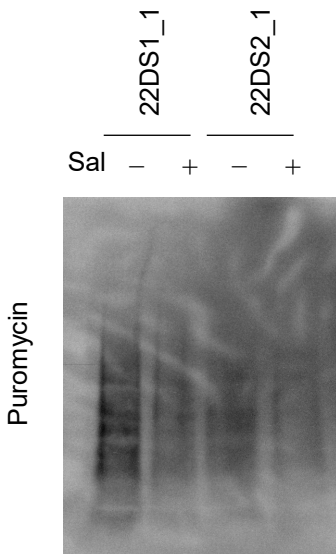

β-actin →

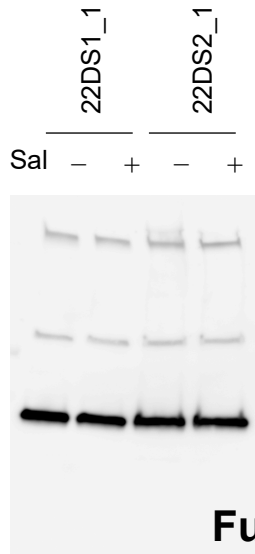

### Full blots for Figure 6c

The right membrane was the same as the left.

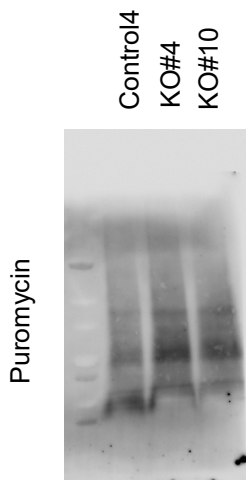

β-actin →

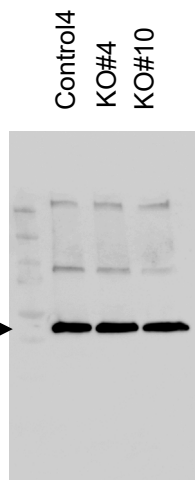

### Full blots for Figure 6d

The right membrane was the same as the left.

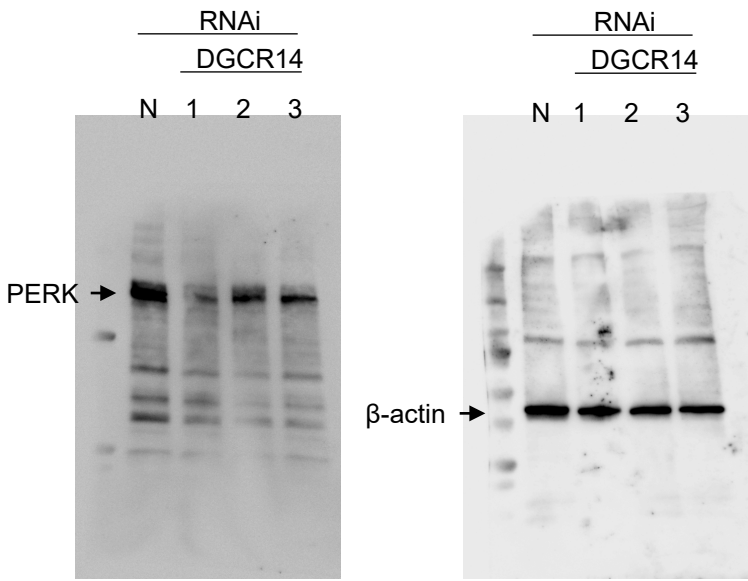

### Full blots for Figure 8b

The right membrane was the same as the left.

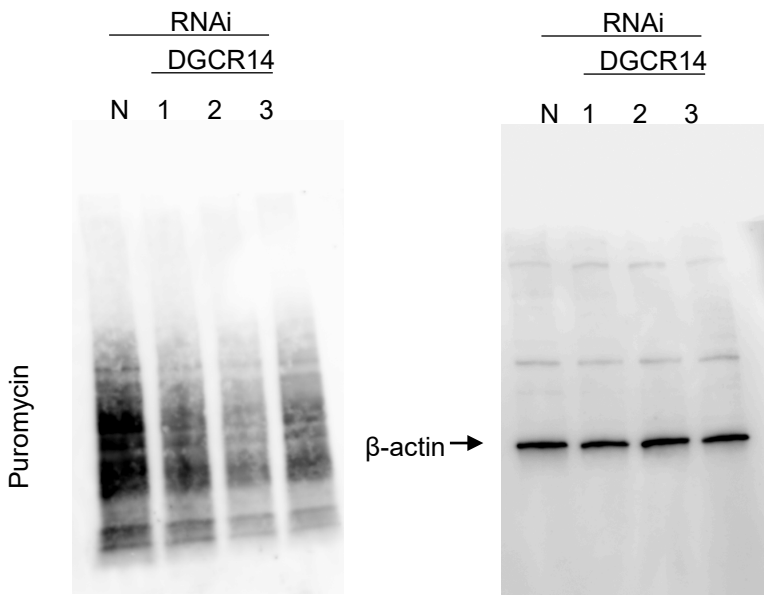

### Full blots for Figure 8e

The right membrane was the same as the left.

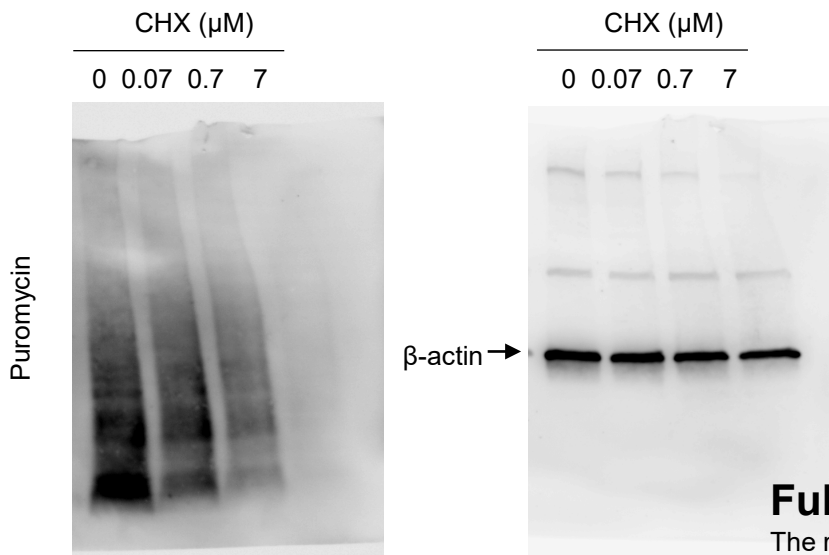

### Full blots for Figure 8g

The right membrane was the same as the left.

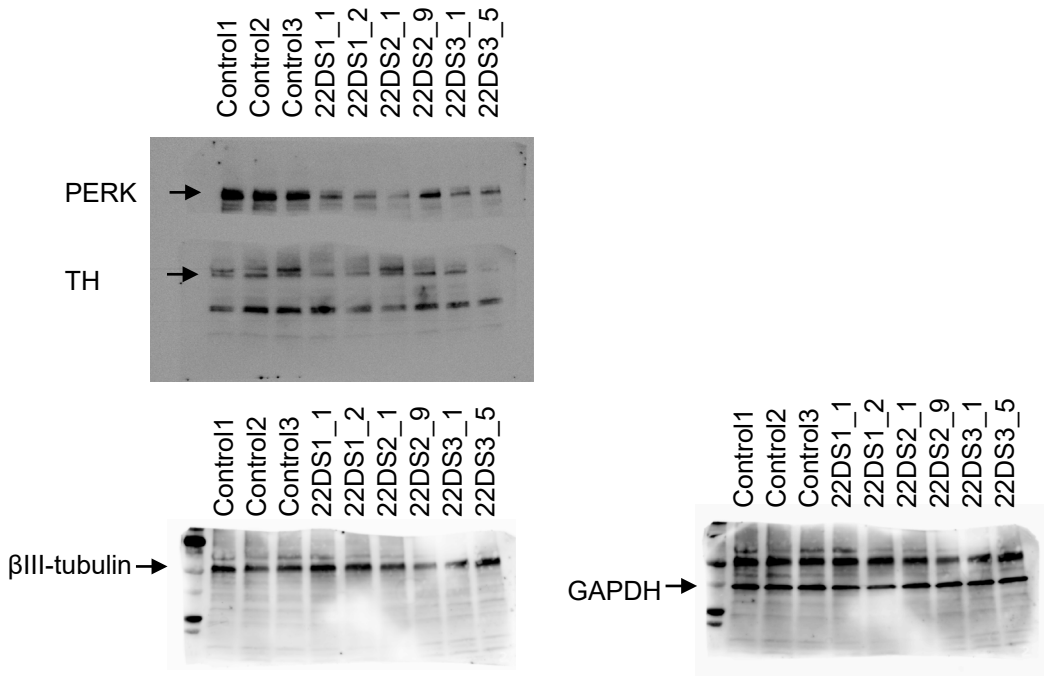

### Full blots for Supplementary Figure 6a

After blotting, the membrane was cut in two. The cut membrane was used for detecting PERK and TH expression. The upper was used for PERK and the lower was used for TH,  $\beta$ III-tubulin, and GAPDH.

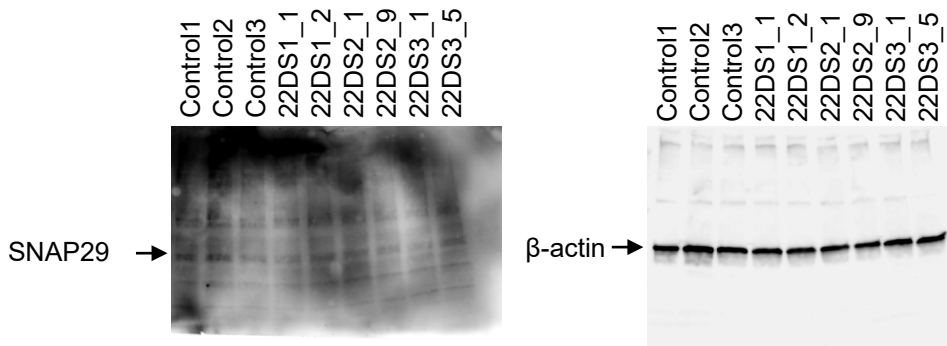

### Full blots for Supplementary Figure 6c

The right membrane was the same as the left one.
